# Supplementary material for: PathwayMultiomics: An R Package for Efficient Integrative Analysis of Multi-Omics Datasets With Matched or Un-matched Samples
Source: Front Genet. 2021 Dec 22;12:783713. doi: 10.3389/fgene.2021.783713 (PMC8729182; doi:10.3389/fgene.2021.783713)
Supplement: Supplementary file 1 [file DataSheet1.xlsx]

## Sheet: S1
	Supplmentary Table 1 Test sizes (false positive rate) for pathwayMultiomics P-values estimated using approximation or simulation.
		Parameter for Beta distribution		Test Size
	pathwayMultiomics method	alpha	beta	Median	Mean
	P-values based on simulation	1.85	1.9	0.044	0.054
	P-values based on approximation	2	2	0.044	0.063

## Sheet: S2
	Supplementary Table 2 Area under ROC curves (AUCs) for different methods at each simulation scenario.
	Simulation Scenarios		AUCs for multi-omics analysis
						mitch		pathwayMultiomics
	TreatProp	EffectSize	sparse mCCA	ade4 MFA	iProFun	by tStat	by pValue	by approximation	by simulation
	0.2	0.1	NA	0.504689	0.495556	0.469889	0.386933	0.4986	0.4986
	0.2	0.2	NA	0.511044	0.504133	0.453356	0.404644	0.537533	0.537533
	0.2	0.3	NA	0.512089	0.519311	0.455956	0.460511	0.602511	0.602511
	0.2	0.4	NA	0.518778	0.5426	0.466156	0.494711	0.682467	0.682467
	0.2	0.5	NA	0.519111	0.566	0.472689	0.514444	0.7434	0.7434
	0.4	0.1	NA	0.508644	0.4984	0.500044	0.338022	0.551044	0.551044
	0.4	0.2	NA	0.521289	0.519244	0.531778	0.503756	0.683911	0.683911
	0.4	0.3	NA	0.533622	0.546489	0.573911	0.642	0.822689	0.822689
	0.4	0.4	NA	0.542444	0.588289	0.605444	0.710267	0.920489	0.920489
	0.4	0.5	NA	0.5618	0.640689	0.622956	0.744356	0.968533	0.968533
	0.6	0.1	NA	0.519244	0.502311	0.565422	0.418	0.610733	0.610733
	0.6	0.2	NA	0.529222	0.533511	0.686933	0.712644	0.8184	0.8184
	0.6	0.3	NA	0.549867	0.5794	0.756133	0.840933	0.946889	0.946889
	0.6	0.4	NA	0.571689	0.641044	0.787133	0.884089	0.991311	0.991311
	0.6	0.5	NA	0.6168	0.710356	0.805444	0.903578	0.999311	0.999311
	0.8	0.1	NA	0.516867	0.505511	0.647489	0.554	0.673689	0.673689
	0.8	0.2	NA	0.540289	0.546311	0.8242	0.851778	0.913578	0.913578
	0.8	0.3	NA	0.573333	0.604933	0.881267	0.935	0.989067	0.989067
	0.8	0.4	NA	0.610156	0.685422	0.901244	0.956422	0.999378	0.999378
	0.8	0.5	0.514667	0.675822	0.768667	0.910711	0.965267	1	1
	1 pathwayMultiomics (approximation) P-values were estimated using approximation based on Beta (2,2) distribution
	2 pathwayMultiomics (simulation) P-values were estimated using the distribution Beta (1.85, 1.9) which were obtained using simulations.

## Sheet: S3
	Supplementary Table 3 At 5% FDR, a total of 66 pathways were significantly associated with AD in GWAS data. The meta-analysis results for individual genetic variants described in Kunkle et al. (2019) was used as input and the mixed models approach was used for GWAS pathway analysis.
	Pathway	pVal	FDR
	REACTOME_PD_1_SIGNALING	4.291e-87	1.21264e-83
	REACTOME_GENERATION_OF_SECOND_MESSENGER_MOLECULES	1.12858e-80	1.59469e-77
	KEGG_ASTHMA	7.06061e-76	6.65109e-73
	BIOCARTA_TCRA_PATHWAY	1.78387e-71	1.0283e-68
	BIOCARTA_EOSINOPHILS_PATHWAY	1.81935e-71	1.0283e-68
	BIOCARTA_BBCELL_PATHWAY	2.63136e-71	1.23937e-68
	KEGG_INTESTINAL_IMMUNE_NETWORK_FOR_IGA_PRODUCTION	1.81632e-70	7.33274e-68
	BIOCARTA_BLYMPHOCYTE_PATHWAY	3.30985e-69	1.1692e-66
	BIOCARTA_IL5_PATHWAY	6.40339e-69	2.01066e-66
	KEGG_AUTOIMMUNE_THYROID_DISEASE	3.72361e-67	1.05229e-64
	REACTOME_COSTIMULATION_BY_THE_CD28_FAMILY	1.03176e-65	2.6507e-63
	KEGG_ANTIGEN_PROCESSING_AND_PRESENTATION	1.69864e-65	4.0003e-63
	BIOCARTA_ASBCELL_PATHWAY	1.73514e-64	3.77194e-62
	KEGG_LEISHMANIA_INFECTION	2.82488e-62	5.70221e-60
	BIOCARTA_CSK_PATHWAY	8.49946e-62	1.6013e-59
	WP_PATHOGENESIS_OF_SARSCOV2_MEDIATED_BY_NSP9NSP10_COMPLEX	1.06103e-59	1.87405e-57
	KEGG_GRAFT_VERSUS_HOST_DISEASE	3.50933e-59	5.83375e-57
	BIOCARTA_MHC_PATHWAY	3.89235e-59	6.11099e-57
	KEGG_ALLOGRAFT_REJECTION	6.99818e-59	1.04089e-56
	BIOCARTA_CTLA4_PATHWAY	8.51005e-58	1.20247e-55
	REACTOME_INTERFERON_SIGNALING	2.518e-57	3.3885e-55
	KEGG_TYPE_I_DIABETES_MELLITUS	1.43117e-56	1.8384e-54
	BIOCARTA_TH1TH2_PATHWAY	2.14158e-56	2.63135e-54
	REACTOME_INTERFERON_GAMMA_SIGNALING	3.48089e-56	4.09874e-54
	BIOCARTA_INFLAM_PATHWAY	3.30504e-55	3.73602e-53
	REACTOME_MHC_CLASS_II_ANTIGEN_PRESENTATION	7.07021e-55	7.68477e-53
	KEGG_SYSTEMIC_LUPUS_ERYTHEMATOSUS	2.13893e-54	2.23875e-52
	REACTOME_TCR_SIGNALING	6.05873e-52	6.11499e-50
	KEGG_VIRAL_MYOCARDITIS	1.22377e-51	1.19254e-49
	WP_ALLOGRAFT_REJECTION	1.29679e-49	1.22157e-47
	WP_EBOLA_VIRUS_PATHWAY_ON_HOST	6.75948e-41	6.16203e-39
	KEGG_HEMATOPOIETIC_CELL_LINEAGE	3.66747e-36	3.23883e-34
	WP_CYTOKINES_AND_INFLAMMATORY_RESPONSE	1.60219e-30	1.37206e-28
	WP_CANCER_IMMUNOTHERAPY_BY_CTLA4_BLOCKADE	8.97195e-26	7.45728e-24
	WP_CANCER_IMMUNOTHERAPY_BY_PD1_BLOCKADE	2.29461e-17	1.85273e-15
	WP_VITAMIN_D_RECEPTOR_PATHWAY	3.05677e-16	2.39956e-14
	KEGG_REGULATION_OF_AUTOPHAGY	3.35475e-09	2.5623e-07
	REACTOME_REGULATION_OF_IFNA_SIGNALING	8.82329e-09	6.56174e-07
	REACTOME_TRAF6_MEDIATED_IRF7_ACTIVATION	3.30162e-08	2.39241e-06
	REACTOME_INTERFERON_ALPHA_BETA_SIGNALING	5.06876e-07	3.58108e-05
	WP_GENES_INVOLVED_IN_MALE_INFERTILITY	2.34852e-06	0.000161876
	REACTOME_FACTORS_INVOLVED_IN_MEGAKARYOCYTE_DEVELOPMENT_AND_PLATELET_PRODUCTION	3.32047e-06	0.00022342
	WP_SARS_CORONAVIRUS_AND_INNATE_IMMUNITY	4.08412e-06	0.000259796
	WP_CYTOSOLIC_DNASENSING_PATHWAY	4.13194e-06	0.000259796
	KEGG_CYTOSOLIC_DNA_SENSING_PATHWAY	4.13687e-06	0.000259796
	KEGG_RIG_I_LIKE_RECEPTOR_SIGNALING_PATHWAY	4.40957e-06	0.000270901
	REACTOME_VLDL_ASSEMBLY	1.65424e-05	0.000994654
	REACTOME_DDX58_IFIH1_MEDIATED_INDUCTION_OF_INTERFERON_ALPHA_BETA	1.89685e-05	0.00111677
	KEGG_NATURAL_KILLER_CELL_MEDIATED_CYTOTOXICITY	1.94884e-05	0.00112396
	REACTOME_ASSEMBLY_OF_ACTIVE_LPL_AND_LIPC_LIPASE_COMPLEXES	2.73577e-05	0.00154626
	WP_REGULATION_OF_TOLLLIKE_RECEPTOR_SIGNALING_PATHWAY	3.76266e-05	0.00208496
	WP_OVERVIEW_OF_INTERFERONSMEDIATED_SIGNALING_PATHWAY	6.2272e-05	0.00338424
	REACTOME_CHYLOMICRON_ASSEMBLY	0.000112386	0.00599249
	REACTOME_HDL_REMODELING	0.000121148	0.00623967
	WP_TOLLLIKE_RECEPTOR_SIGNALING_PATHWAY	0.000121437	0.00623967
	KEGG_TOLL_LIKE_RECEPTOR_SIGNALING_PATHWAY	0.000134833	0.00680426
	REACTOME_BUTYROPHILIN_BTN_FAMILY_INTERACTIONS	0.000146218	0.00724935
	REACTOME_CHYLOMICRON_REMODELING	0.000183661	0.00894871
	REACTOME_NR1H3_NR1H2_REGULATE_GENE_EXPRESSION_LINKED_TO_CHOLESTEROL_TRANSPORT_AND_EFFLUX	0.000251326	0.0120381
	WP_STATIN_PATHWAY	0.000262726	0.0123744
	REACTOME_PLASMA_LIPOPROTEIN_CLEARANCE	0.000302042	0.013993
	PID_TCR_PATHWAY	0.000447836	0.0204127
	PID_CXCR4_PATHWAY	0.000487446	0.0218654
	PID_IL12_STAT4_PATHWAY	0.000593004	0.0259974
	WP_PI3KAKTMTOR_VITD3_SIGNALLING	0.000597958	0.0259974
	REACTOME_NR1H2_AND_NR1H3_MEDIATED_SIGNALING	0.000800931	0.0342944

## Sheet: S4
	Supplementary Table 4 At 5% FDR, a total of 2 pathways were significantly associated with AD (neuropathology) in DNA methylation data. The combined collection of FDR-significant individual CpGs and CpGs located in FDR-significant DMRs in Zhang et al. (2021) were used as input for MissMethyl pathway analysis.
	pathway	N	DE	P.DE	FDR
	WP_MICROGLIA_PATHOGEN_PHAGOCYTOSIS_PATHWAY	39	16	2.99913e-07	0.000713534
	WP_TYROBP_CAUSAL_NETWORK	59	20	5.03731e-07	0.000713534

## Sheet: S5
	Supplementary Table 5 At 5% FDR, a total of 666 significant pathways were significantly associated with AD (neuropathology) in RNA-seq data. We analyzed a total of 640 samples from the ROSMAP AD study. For each gene, we fitted the linear model log2(normalized FPKM values + 1) ~ Braak stage + ageAtDeath + sex + cell type markers. Next, we ranked genes by P-values for Braak stage, and the ranked ge…
	pathway	NES	size	pval	padj
	REACTOME_POTASSIUM_CHANNELS	1.54259	102	7.03935e-09	1.99425e-05
	REACTOME_RAC1_GTPASE_CYCLE	1.41816	170	2.79144e-08	3.82506e-05
	WP_TGFBETA_SIGNALING_PATHWAY	1.4747	127	5.08715e-08	3.82506e-05
	KEGG_INSULIN_SIGNALING_PATHWAY	1.45527	130	5.40072e-08	3.82506e-05
	WP_INTEGRATED_BREAST_CANCER_PATHWAY	1.41496	148	1.00148e-07	5.6744e-05
	REACTOME_SUMOYLATION	1.39193	168	1.50701e-07	6.18439e-05
	BIOCARTA_MAPK_PATHWAY	1.52047	78	1.52809e-07	6.18439e-05
	WP_BRAINDERIVED_NEUROTROPHIC_FACTOR_BDNF_SIGNALING_PATHWAY	1.43978	135	2.22404e-07	7.6675e-05
	WP_RAS_SIGNALING	1.37833	177	2.43585e-07	7.6675e-05
	REACTOME_NEUROTRANSMITTER_RECEPTORS_AND_POSTSYNAPTIC_SIGNAL_TRANSMISSION	1.37691	189	2.77474e-07	7.86083e-05
	KEGG_UBIQUITIN_MEDIATED_PROTEOLYSIS	1.44148	127	3.49489e-07	8.27226e-05
	REACTOME_REGULATION_OF_TP53_ACTIVITY	1.40383	153	3.83378e-07	8.27226e-05
	REACTOME_PROTEIN_LOCALIZATION	1.40308	152	3.9185e-07	8.27226e-05
	REACTOME_CDC42_GTPASE_CYCLE	1.38915	146	4.08795e-07	8.27226e-05
	WP_EGFEGFR_SIGNALING_PATHWAY	1.39692	156	4.3849e-07	8.28162e-05
	KEGG_CHRONIC_MYELOID_LEUKEMIA	1.52884	71	7.62028e-07	0.000134927
	WP_SIGNALING_PATHWAYS_IN_GLIOBLASTOMA	1.48475	80	9.15535e-07	0.000152571
	WP_SMALL_CELL_LUNG_CANCER	1.4575	93	9.83985e-07	0.000154868
	REACTOME_ER_TO_GOLGI_ANTEROGRADE_TRANSPORT	1.3703	151	1.30912e-06	0.000195197
	WP_INSULIN_SIGNALING	1.36867	155	1.48024e-06	0.00019695
	KEGG_GLIOMA	1.51713	64	1.61714e-06	0.00019695
	REACTOME_RAB_REGULATION_OF_TRAFFICKING	1.42041	113	1.61714e-06	0.00019695
	WP_MICRORNAS_IN_CARDIOMYOCYTE_HYPERTROPHY	1.4876	81	1.65137e-06	0.00019695
	WP_ANGIOPOIETIN_LIKE_PROTEIN_8_REGULATORY_PATHWAY	1.41696	127	1.66848e-06	0.00019695
	WP_HEAD_AND_NECK_SQUAMOUS_CELL_CARCINOMA	1.48982	73	1.9089e-06	0.000215492
	REACTOME_SIGNALING_BY_NTRKS	1.38699	131	1.97769e-06	0.000215492
	WP_REGULATION_OF_ACTIN_CYTOSKELETON	1.38029	139	2.90632e-06	0.000304948
	KEGG_NEUROTROPHIN_SIGNALING_PATHWAY	1.4025	120	3.45662e-06	0.000347789
	WP_GASTRIN_SIGNALING_PATHWAY	1.40593	113	3.56015e-06	0.000347789
	REACTOME_PROTEIN_UBIQUITINATION	1.4948	68	4.04403e-06	0.000376383
	WP_TNF_ALPHA_SIGNALING_PATHWAY	1.45423	87	4.18229e-06	0.000376383
	KEGG_NON_SMALL_CELL_LUNG_CANCER	1.54055	52	4.25142e-06	0.000376383
	WP_HEPATITIS_B_INFECTION	1.35854	145	4.59705e-06	0.00039465
	REACTOME_HIV_LIFE_CYCLE	1.3704	141	4.80443e-06	0.000400322
	KEGG_FOCAL_ADHESION	1.31863	194	5.2192e-06	0.000410722
	REACTOME_AUTOPHAGY	1.36665	142	5.2192e-06	0.000410722
	REACTOME_MITOTIC_G1_PHASE_AND_G1_S_TRANSITION	1.35476	144	5.49571e-06	0.000420793
	REACTOME_ACTIVATION_OF_ANTERIOR_HOX_GENES_IN_HINDBRAIN_DEVELOPMENT_DURING_EARLY_EMBRYOGENESIS	1.44492	86	5.84135e-06	0.000435488
	REACTOME_TRANSPORT_TO_THE_GOLGI_AND_SUBSEQUENT_MODIFICATION	1.32598	182	6.11786e-06	0.000444407
	REACTOME_CIRCADIAN_CLOCK	1.47216	69	7.01652e-06	0.000496945
	WP_EGFR_TYROSINE_KINASE_INHIBITOR_RESISTANCE	1.44985	83	8.26695e-06	0.000571226
	KEGG_PANCREATIC_CANCER	1.46736	66	9.23951e-06	0.000621735
	REACTOME_PTEN_REGULATION	1.3739	135	9.51738e-06	0.000621735
	KEGG_SMALL_CELL_LUNG_CANCER	1.43182	82	9.65632e-06	0.000621735
	WP_16P112_PROXIMAL_DELETION_SYNDROME	1.47857	70	1.02121e-05	0.000642906
	PID_INSULIN_PATHWAY	1.5577	44	1.11846e-05	0.000682546
	REACTOME_MITOCHONDRIAL_BIOGENESIS	1.43071	87	1.13236e-05	0.000682546
	WP_AGERAGE_PATHWAY	1.47493	64	1.20183e-05	0.000709328
	REACTOME_TRANSCRIPTION_OF_THE_HIV_GENOME	1.49483	63	1.22961e-05	0.000710917
	REACTOME_FC_EPSILON_RECEPTOR_FCERI_SIGNALING	1.37986	126	1.31298e-05	0.000732561
	WP_B_CELL_RECEPTOR_SIGNALING_PATHWAY	1.40493	93	1.32687e-05	0.000732561
	PID_RAC1_PATHWAY	1.51167	52	1.36855e-05	0.000732561
	REACTOME_CELLULAR_RESPONSE_TO_STARVATION	1.33418	148	1.38245e-05	0.000732561
	WP_FOCAL_ADHESION	1.31285	192	1.39634e-05	0.000732561
	REACTOME_HCMV_INFECTION	1.3619	122	1.54986e-05	0.000798063
	KEGG_PROSTATE_CANCER	1.4175	85	1.6057e-05	0.000798063
	PID_IGF1_PATHWAY	1.63607	29	1.6057e-05	0.000798063
	WP_NONSMALL_CELL_LUNG_CANCER	1.4702	70	1.66155e-05	0.000811583
	WP_MELANOMA	1.45343	66	1.8291e-05	0.000876826
	REACTOME_RHOA_GTPASE_CYCLE	1.36104	140	1.85703e-05	0.000876826
	WP_CHEMOKINE_SIGNALING_PATHWAY	1.32628	155	1.9408e-05	0.00089958
	WP_PANCREATIC_ADENOCARCINOMA_PATHWAY	1.42409	84	1.96873e-05	0.00089958
	KEGG_ALDOSTERONE_REGULATED_SODIUM_REABSORPTION	1.57343	40	2.24797e-05	0.00101087
	REACTOME_REGULATION_OF_CHOLESTEROL_BIOSYNTHESIS_BY_SREBP_SREBF	1.49659	52	2.44345e-05	0.00106497
	REACTOME_VOLTAGE_GATED_POTASSIUM_CHANNELS	1.56318	42	2.44345e-05	0.00106497
	WP_AMYOTROPHIC_LATERAL_SCLEROSIS_ALS	1.5529	37	2.4993e-05	0.0010728
	REACTOME_FORMATION_OF_RNA_POL_II_ELONGATION_COMPLEX	1.48252	56	2.72269e-05	0.00113432
	WP_RAC1PAK1P38MMP2_PATHWAY	1.4443	66	2.72269e-05	0.00113432
	REACTOME_RAB_GEFS_EXCHANGE_GTP_FOR_GDP_ON_RABS	1.41202	84	2.89052e-05	0.00116983
	WP_MAPK_CASCADE	1.59978	31	2.89052e-05	0.00116983
	WP_ESTROGEN_SIGNALING_PATHWAY	1.64778	21	2.94664e-05	0.00117575
	REACTOME_SARS_COV_INFECTIONS	1.33642	141	3.11502e-05	0.00122567
	REACTOME_MITOTIC_G2_G2_M_PHASES	1.30162	191	3.17114e-05	0.00123066
	REACTOME_SIGNALING_BY_TYPE_1_INSULIN_LIKE_GROWTH_FACTOR_1_RECEPTOR_IGF1R	1.49592	51	3.28339e-05	0.00124025
	REACTOME_S_PHASE	1.32817	157	3.28339e-05	0.00124025
	PID_P73PATHWAY	1.41025	78	3.50789e-05	0.00130761
	REACTOME_INTRA_GOLGI_AND_RETROGRADE_GOLGI_TO_ER_TRAFFIC	1.29139	196	4.12527e-05	0.00151778
	KEGG_MELANOMA	1.4348	67	4.29365e-05	0.00155947
	KEGG_INOSITOL_PHOSPHATE_METABOLISM	1.47938	52	4.46202e-05	0.00158011
	REACTOME_RRNA_PROCESSING	1.2884	188	4.46202e-05	0.00158011
	KEGG_AXON_GUIDANCE	1.36354	123	4.68652e-05	0.00163913
	PID_TGFBR_PATHWAY	1.50333	54	4.79877e-05	0.00165792
	REACTOME_SYNTHESIS_OF_PIPS_AT_THE_PLASMA_MEMBRANE	1.5205	46	4.91102e-05	0.00167523
	PID_CDC42_PATHWAY	1.42918	69	4.96715e-05	0.00167523
	REACTOME_REGULATION_OF_EXPRESSION_OF_SLITS_AND_ROBOS	1.29966	160	5.13553e-05	0.00171023
	REACTOME_PI_METABOLISM	1.42997	76	5.19165e-05	0.00171023
	BIOCARTA_AT1R_PATHWAY	1.62211	26	5.41615e-05	0.00176367
	REACTOME_INSULIN_RECEPTOR_SIGNALLING_CASCADE	1.47218	52	5.80958e-05	0.00187029
	REACTOME_TRANSCRIPTIONAL_ACTIVATION_OF_MITOCHONDRIAL_BIOGENESIS	1.47062	52	6.3736e-05	0.00202881
	WP_STEROL_REGULATORY_ELEMENTBINDING_PROTEINS_SREBP_SIGNALLING	1.42637	67	6.71202e-05	0.0021016
	WP_AMPACTIVATED_PROTEIN_KINASE_AMPK_SIGNALING	1.42454	67	6.82482e-05	0.0021016
	WP_PYRIMIDINE_METABOLISM	1.39012	80	6.82482e-05	0.0021016
	KEGG_COLORECTAL_CANCER	1.44974	61	7.16323e-05	0.00218209
	KEGG_AMYOTROPHIC_LATERAL_SCLEROSIS_ALS	1.47566	51	7.38884e-05	0.00222687
	REACTOME_RNA_POLYMERASE_II_TRANSCRIBES_SNRNA_GENES	1.39767	77	7.50165e-05	0.00223707
	PID_ERBB1_DOWNSTREAM_PATHWAY	1.36795	103	7.72726e-05	0.00226642
	BIOCARTA_CD40_PATHWAY	1.70548	12	7.84006e-05	0.00226642
	KEGG_B_CELL_RECEPTOR_SIGNALING_PATHWAY	1.40503	73	7.84006e-05	0.00226642
	WP_PROLACTIN_SIGNALING_PATHWAY	1.41619	74	8.06567e-05	0.00230809
	REACTOME_REGULATION_OF_TP53_ACTIVITY_THROUGH_PHOSPHORYLATION	1.39102	87	8.29128e-05	0.00234892
	WP_MBDNF_AND_PROBDNF_REGULATION_OF_GABA_NEUROTRANSMISSION	1.54599	35	8.51689e-05	0.00238895
	KEGG_FC_GAMMA_R_MEDIATED_PHAGOCYTOSIS	1.38305	92	8.6297e-05	0.00239686
	REACTOME_RAC2_GTPASE_CYCLE	1.40491	81	8.85531e-05	0.00243564
	WP_ANDROGEN_RECEPTOR_SIGNALING_PATHWAY	1.38639	86	9.41933e-05	0.00254143
	WP_SYNAPTIC_SIGNALING_PATHWAYS_ASSOCIATED_WITH_AUTISM_SPECTRUM_DISORDER	1.48002	49	9.41933e-05	0.00254143
	REACTOME_SIGNALING_BY_INSULIN_RECEPTOR	1.41231	75	9.64494e-05	0.00255366
	WP_CARDIAC_HYPERTROPHIC_RESPONSE	1.46152	52	9.64494e-05	0.00255366
	REACTOME_DNA_DOUBLE_STRAND_BREAK_REPAIR	1.29532	147	9.87055e-05	0.00258919
	BIOCARTA_P38MAPK_PATHWAY	1.5385	35	0.000103218	0.00265833
	WP_IL1_SIGNALING_PATHWAY	1.46517	51	0.000103218	0.00265833
	KEGG_ENDOMETRIAL_CANCER	1.47823	50	0.000105474	0.00267259
	BIOCARTA_HDAC_PATHWAY	1.57582	25	0.000106602	0.00267259
	PID_EPHB_FWD_PATHWAY	1.51927	39	0.000106602	0.00267259
	REACTOME_INFLUENZA_INFECTION	1.29517	149	0.000108858	0.00268169
	REACTOME_UREA_CYCLE	1.74333	9	0.000108858	0.00268169
	PID_KIT_PATHWAY	1.45643	52	0.000109986	0.00268612
	REACTOME_SIGNALING_BY_FGFR1	1.44842	48	0.000111114	0.00269048
	KEGG_FC_EPSILON_RI_SIGNALING_PATHWAY	1.38836	77	0.000112242	0.00269476
	KEGG_APOPTOSIS	1.39668	81	0.0001213	0.00286306
	WP_PHOSPHOINOSITIDES_METABOLISM	1.49849	44	0.0001213	0.00286306
	REACTOME_ACTIVATION_OF_NMDA_RECEPTORS_AND_POSTSYNAPTIC_EVENTS	1.37946	84	0.000123567	0.00286306
	BIOCARTA_PYK2_PATHWAY	1.56758	27	0.000125834	0.00286306
	KEGG_GAP_JUNCTION	1.37828	86	0.000125834	0.00286306
	WP_EPITHELIAL_TO_MESENCHYMAL_TRANSITION_IN_COLORECTAL_CANCER	1.30436	157	0.000125834	0.00286306
	REACTOME_SPHINGOLIPID_METABOLISM	1.37781	84	0.000128102	0.00286306
	WP_MELATONIN_METABOLISM_AND_EFFECTS	1.53584	33	0.000128102	0.00286306
	BIOCARTA_NFAT_PATHWAY	1.47402	50	0.000130369	0.00286306
	PID_P53_REGULATION_PATHWAY	1.4322	58	0.000130369	0.00286306
	REACTOME_E3_UBIQUITIN_LIGASES_UBIQUITINATE_TARGET_PROTEINS	1.47455	50	0.000130369	0.00286306
	WP_DNA_DAMAGE_RESPONSE_ONLY_ATM_DEPENDENT	1.33972	110	0.000132636	0.00289044
	REACTOME_HIV_TRANSCRIPTION_INITIATION	1.52027	40	0.000134903	0.00289531
	WP_DNA_REPAIR_PATHWAYS_FULL_NETWORK	1.33599	114	0.000134903	0.00289531
	BIOCARTA_PPARA_PATHWAY	1.44986	52	0.000143972	0.00306672
	BIOCARTA_FCER1_PATHWAY	1.50865	37	0.000148507	0.00309352
	REACTOME_DEATH_RECEPTOR_SIGNALLING	1.33031	129	0.000148507	0.00309352
	WP_CELL_CYCLE	1.32964	117	0.000148507	0.00309352
	REACTOME_SIGNALING_BY_PDGF	1.44626	57	0.000150774	0.00309523
	WP_ERBB_SIGNALING_PATHWAY	1.37506	87	0.000150774	0.00309523
	WP_ENDOMETRIAL_CANCER	1.4271	61	0.00016211	0.00327944
	KEGG_CELL_CYCLE	1.3215	121	0.000164377	0.00327944
	REACTOME_METABOLISM_OF_STEROIDS	1.29204	145	0.000164377	0.00327944
	WP_MET_IN_TYPE_1_PAPILLARY_RENAL_CELL_CARCINOMA	1.43001	55	0.000164377	0.00327944
	PID_PDGFRB_PATHWAY	1.32545	126	0.000166645	0.00330019
	BIOCARTA_TFF_PATHWAY	1.59201	24	0.000168912	0.00330019
	REACTOME_TOLL_LIKE_RECEPTOR_9_TLR9_CASCADE	1.37112	88	0.000168912	0.00330019
	REACTOME_DOWNSTREAM_SIGNALING_EVENTS_OF_B_CELL_RECEPTOR_BCR	1.3746	78	0.000182515	0.00351745
	REACTOME_SELECTIVE_AUTOPHAGY	1.37429	78	0.000182515	0.00351745
	KEGG_ERBB_SIGNALING_PATHWAY	1.36662	84	0.000189317	0.00359956
	REACTOME_COPII_MEDIATED_VESICLE_TRANSPORT	1.39615	66	0.000189317	0.00359956
	KEGG_PHOSPHATIDYLINOSITOL_SIGNALING_SYSTEM	1.39276	74	0.000193851	0.00361303
	WP_G_PROTEIN_SIGNALING_PATHWAYS	1.35866	92	0.000193851	0.00361303
	WP_PATHWAYS_AFFECTED_IN_ADENOID_CYSTIC_CARCINOMA	1.43843	57	0.000193851	0.00361303
	WP_MAPK_AND_NFKB_SIGNALLING_PATHWAYS_INHIBITED_BY_YERSINIA_YOPJ	1.70984	10	0.000200653	0.00371536
	REACTOME_GABA_RECEPTOR_ACTIVATION	1.43622	57	0.000207455	0.00379174
	REACTOME_SIGNALLING_TO_RAS	1.61929	20	0.000207455	0.00379174
	REACTOME_INOSITOL_PHOSPHATE_METABOLISM	1.48231	44	0.000214257	0.00389095
	PID_MET_PATHWAY	1.36824	78	0.000218791	0.00394799
	REACTOME_CELLULAR_RESPONSE_TO_CHEMICAL_STRESS	1.28191	149	0.000223326	0.00397913
	REACTOME_RAC3_GTPASE_CYCLE	1.36206	84	0.000223326	0.00397913
	REACTOME_HCMV_EARLY_EVENTS	1.34917	98	0.00022786	0.00400949
	REACTOME_SIGNALING_BY_VEGF	1.35575	102	0.00022786	0.00400949
	PID_TRAIL_PATHWAY	1.54825	27	0.000239241	0.0041581
	WP_MIRNA_REGULATION_OF_PROSTATE_CANCER_SIGNALING_PATHWAYS	1.51985	31	0.000239241	0.0041581
	REACTOME_MITOCHONDRIAL_PROTEIN_IMPORT	1.4286	57	0.000248355	0.00429017
	REACTOME_CILIUM_ASSEMBLY	1.27073	193	0.000257468	0.00439402
	REACTOME_TP53_REGULATES_TRANSCRIPTION_OF_DNA_REPAIR_GENES	1.41549	60	0.000257468	0.00439402
	REACTOME_HIV_TRANSCRIPTION_ELONGATION	1.48158	41	0.000266582	0.00452232
	KEGG_ENDOCYTOSIS	1.27221	177	0.000271139	0.00454519
	PID_MYC_REPRESS_PATHWAY	1.41074	61	0.000271139	0.00454519
	KEGG_PEROXISOME	1.38282	76	0.000275696	0.00456296
	REACTOME_IRS_MEDIATED_SIGNALLING	1.46123	46	0.000275696	0.00456296
	KEGG_WNT_SIGNALING_PATHWAY	1.27953	145	0.000280253	0.00456296
	PID_RB_1PATHWAY	1.41315	60	0.000280253	0.00456296
	WP_OSTEOBLAST_DIFFERENTIATION	1.32127	116	0.000280253	0.00456296
	REACTOME_ONCOGENIC_MAPK_SIGNALING	1.35203	79	0.000289366	0.00465187
	REACTOME_RHOG_GTPASE_CYCLE	1.38657	70	0.000289366	0.00465187
	REACTOME_TRANSLOCATION_OF_SLC2A4_GLUT4_TO_THE_PLASMA_MEMBRANE	1.3847	70	0.000293923	0.00465187
	REACTOME_TRANSPORT_OF_INORGANIC_CATIONS_ANIONS_AND_AMINO_ACIDS_OLIGOPEPTIDES	1.32782	100	0.000293923	0.00465187
	WP_RESISTIN_AS_A_REGULATOR_OF_INFLAMMATION	1.51048	32	0.000293923	0.00465187
	KEGG_CHEMOKINE_SIGNALING_PATHWAY	1.27016	172	0.00029848	0.00469774
	KEGG_PYRIMIDINE_METABOLISM	1.34105	94	0.000307594	0.00481444
	REACTOME_MITOCHONDRIAL_TRANSLATION	1.34662	92	0.000321264	0.00497345
	REACTOME_REGULATION_OF_LIPID_METABOLISM_BY_PPARALPHA	1.31791	116	0.000321264	0.00497345
	REACTOME_SIGNALING_BY_FGFR	1.35151	84	0.000334935	0.0051569
	KEGG_CALCIUM_SIGNALING_PATHWAY	1.26446	167	0.000339492	0.00519881
	PID_P38_ALPHA_BETA_DOWNSTREAM_PATHWAY	1.48109	37	0.000348605	0.00530967
	REACTOME_TRANSPORT_OF_BILE_SALTS_AND_ORGANIC_ACIDS_METAL_IONS_AND_AMINE_COMPOUNDS	1.34437	82	0.000353162	0.00535031
	REACTOME_ESTROGEN_DEPENDENT_GENE_EXPRESSION	1.29379	115	0.000375947	0.0056652
	WP_HIPPOMERLIN_SIGNALING_DYSREGULATION	1.31491	116	0.000380504	0.00570353
	REACTOME_HEDGEHOG_OFF_STATE	1.31301	110	0.00038506	0.00571139
	REACTOME_OXIDATIVE_STRESS_INDUCED_SENESCENCE	1.34721	91	0.00038506	0.00571139
	PID_FAS_PATHWAY	1.48701	36	0.000389617	0.00574888
	REACTOME_LINOLEIC_ACID_LA_METABOLISM	1.70646	7	0.000394174	0.00578599
	REACTOME_MRNA_CAPPING	1.52968	27	0.000403288	0.00588925
	KEGG_VASCULAR_SMOOTH_MUSCLE_CONTRACTION	1.31338	112	0.000416959	0.00599616
	PID_RET_PATHWAY	1.47926	39	0.000416959	0.00599616
	REACTOME_GOLGI_TO_ER_RETROGRADE_TRANSPORT	1.29372	130	0.000416959	0.00599616
	PID_P75_NTR_PATHWAY	1.39961	62	0.000421515	0.00600077
	WP_CHROMOSOMAL_AND_MICROSATELLITE_INSTABILITY_IN_COLORECTAL_CANCER	1.38848	71	0.000421515	0.00600077
	REACTOME_ARMS_MEDIATED_ACTIVATION	1.70432	7	0.000426072	0.00603531
	BIOCARTA_PPARG_PATHWAY	1.69783	8	0.000430629	0.00606951
	REACTOME_NUCLEOTIDE_EXCISION_REPAIR	1.33841	106	0.000439743	0.00616729
	PID_FAK_PATHWAY	1.4102	57	0.000453414	0.00632769
	KEGG_RENAL_CELL_CARCINOMA	1.37372	66	0.00045797	0.00635995
	REACTOME_ASSEMBLY_AND_CELL_SURFACE_PRESENTATION_OF_NMDA_RECEPTORS	1.47501	38	0.000471686	0.00648683
	REACTOME_SEPARATION_OF_SISTER_CHROMATIDS	1.25358	182	0.000471686	0.00648683
	REACTOME_INTRAFLAGELLAR_TRANSPORT	1.42724	54	0.000480845	0.00654802
	WP_MECP2_AND_ASSOCIATED_RETT_SYNDROME	1.36944	67	0.000480845	0.00654802
	KEGG_P53_SIGNALING_PATHWAY	1.36858	67	0.000490003	0.00654802
	PID_TCR_PATHWAY	1.38713	58	0.000490003	0.00654802
	REACTOME_MITOTIC_TELOPHASE_CYTOKINESIS	1.67802	11	0.000490003	0.00654802
	WP_PI3KAKTMTOR_SIGNALING_PATHWAY_AND_THERAPEUTIC_OPPORTUNITIES	1.52376	29	0.000490003	0.00654802
	KEGG_PURINE_METABOLISM	1.27805	153	0.000499162	0.00663909
	REACTOME_MYD88_INDEPENDENT_TLR4_CASCADE	1.341	91	0.000508321	0.00672931
	REACTOME_FORMATION_OF_THE_EARLY_ELONGATION_COMPLEX	1.49354	31	0.000517479	0.00678713
	REACTOME_GLOBAL_GENOME_NUCLEOTIDE_EXCISION_REPAIR_GG_NER	1.34487	80	0.000517479	0.00678713
	REACTOME_GAMMA_CARBOXYLATION_HYPUSINE_FORMATION_AND_ARYLSULFATASE_ACTIVATION	1.47725	35	0.000526638	0.00687542
	PID_CD40_PATHWAY	1.52112	29	0.000535797	0.00693111
	WP_HYPOTHESIZED_PATHWAYS_IN_PATHOGENESIS_OF_CARDIOVASCULAR_DISEASE	1.54971	24	0.000535797	0.00693111
	REACTOME_CONSTITUTIVE_SIGNALING_BY_OVEREXPRESSED_ERBB2	1.67402	11	0.000544955	0.00697691
	REACTOME_PROTEIN_PROTEIN_INTERACTIONS_AT_SYNAPSES	1.36481	76	0.000544955	0.00697691
	REACTOME_CELLULAR_SENESCENCE	1.25266	162	0.000554114	0.00697691
	REACTOME_COHESIN_LOADING_ONTO_CHROMATIN	1.69142	8	0.000554114	0.00697691
	REACTOME_CYTOPROTECTION_BY_HMOX1	1.28483	115	0.000554114	0.00697691
	REACTOME_ION_CHANNEL_TRANSPORT	1.26067	172	0.000554114	0.00697691
	REACTOME_MITOTIC_PROMETAPHASE	1.2474	192	0.000563273	0.00706085
	REACTOME_RAB_GERANYLGERANYLATION	1.40405	57	0.000572432	0.00708165
	REACTOME_SIGNALING_BY_TGFB_FAMILY_MEMBERS	1.32755	98	0.000572432	0.00708165
	WP_MESODERMAL_COMMITMENT_PATHWAY	1.27849	139	0.000572432	0.00708165
	PID_ERBB1_INTERNALIZATION_PATHWAY	1.46847	40	0.00058159	0.00716368
	KEGG_T_CELL_RECEPTOR_SIGNALING_PATHWAY	1.31742	103	0.000590749	0.0071828
	REACTOME_CARGO_TRAFFICKING_TO_THE_PERICILIARY_MEMBRANE	1.40026	48	0.000590749	0.0071828
	REACTOME_COPI_INDEPENDENT_GOLGI_TO_ER_RETROGRADE_TRAFFIC	1.41695	51	0.000590749	0.0071828
	KEGG_LONG_TERM_POTENTIATION	1.38106	65	0.000609066	0.00734249
	REACTOME_MRNA_SPLICING	1.25928	179	0.000609066	0.00734249
	REACTOME_SIGNALING_BY_FGFR2_IN_DISEASE	1.45098	41	0.000618225	0.00735896
	REACTOME_TIE2_SIGNALING	1.61133	18	0.000618225	0.00735896
	WP_VITAMIN_D_IN_INFLAMMATORY_DISEASES	1.57721	20	0.000618225	0.00735896
	SIG_IL4RECEPTOR_IN_B_LYPHOCYTES	1.51226	27	0.000627384	0.00743673
	KEGG_HUNTINGTONS_DISEASE	1.25924	165	0.00065486	0.007698
	WP_REGULATION_OF_TOLLLIKE_RECEPTOR_SIGNALING_PATHWAY	1.29657	128	0.00065486	0.007698
	PID_MTOR_4PATHWAY	1.36042	67	0.000664019	0.00777341
	WP_MYOMETRIAL_RELAXATION_AND_CONTRACTION_PATHWAYS	1.26215	155	0.000682336	0.00795497
	REACTOME_RNA_POLYMERASE_I_PROMOTER_ESCAPE	1.39782	57	0.000691495	0.00802871
	PID_IL2_1PATHWAY	1.41561	54	0.000709813	0.00817439
	REACTOME_SIGNALING_BY_ERBB2	1.41227	50	0.000709813	0.00817439
	BIOCARTA_TCR_PATHWAY	1.46183	43	0.000718971	0.0081801
	REACTOME_COPI_MEDIATED_ANTEROGRADE_TRANSPORT	1.30229	100	0.000718971	0.0081801
	REACTOME_REGULATION_OF_PTEN_GENE_TRANSCRIPTION	1.37997	59	0.000718971	0.0081801
	PID_LYMPH_ANGIOGENESIS_PATHWAY	1.53672	24	0.00072813	0.00825117
	BIOCARTA_EIF4_PATHWAY	1.53531	24	0.000737289	0.00828865
	REACTOME_SIGNALING_BY_MET	1.33201	78	0.000737289	0.00828865
	REACTOME_SIGNALING_BY_ERYTHROPOIETIN	1.51199	25	0.000755606	0.008461
	BIOCARTA_NTHI_PATHWAY	1.5305	22	0.000764765	0.00849639
	WP_TRANSCRIPTION_FACTOR_REGULATION_IN_ADIPOGENESIS	1.53058	22	0.000764765	0.00849639
	REACTOME_TOLL_LIKE_RECEPTOR_CASCADES	1.2553	146	0.000773924	0.00853123
	REACTOME_TRNA_PROCESSING	1.30955	103	0.000773924	0.00853123
	REACTOME_SIGNALING_BY_HEDGEHOG	1.25349	147	0.000783083	0.00859873
	REACTOME_TELOMERE_MAINTENANCE	1.337	86	0.000792241	0.00863238
	WP_COMMON_PATHWAYS_UNDERLYING_DRUG_ADDICTION	1.45189	39	0.000792241	0.00863238
	BIOCARTA_KERATINOCYTE_PATHWAY	1.41062	45	0.0008014	0.00866552
	WP_CALCIUM_REGULATION_IN_THE_CARDIAC_CELL	1.2527	147	0.0008014	0.00866552
	WP_BREAST_CANCER_PATHWAY	1.26097	150	0.000847194	0.00909129
	WP_PROSTAGLANDIN_SYNTHESIS_AND_REGULATION	1.40909	45	0.000847194	0.00909129
	REACTOME_REGULATION_OF_RAS_BY_GAPS	1.35518	66	0.000865511	0.00921802
	WP_THERMOGENESIS	1.30659	105	0.000865511	0.00921802
	REACTOME_CYCLIN_A_CDK2_ASSOCIATED_EVENTS_AT_S_PHASE_ENTRY	1.33223	83	0.00087467	0.00928068
	BIOCARTA_VIP_PATHWAY	1.52318	26	0.000892988	0.00943968
	BIOCARTA_CTCF_PATHWAY	1.52531	24	0.000911305	0.0095975
	KEGG_MELANOGENESIS	1.29718	100	0.000948031	0.00991059
	REACTOME_INTERLEUKIN_1_SIGNALING	1.29153	97	0.000948031	0.00991059
	KEGG_GNRH_SIGNALING_PATHWAY	1.31688	98	0.000966438	0.00999241
	PID_ERBB1_RECEPTOR_PROXIMAL_PATHWAY	1.45799	35	0.000966438	0.00999241
	REACTOME_HOST_INTERACTIONS_OF_HIV_FACTORS	1.27081	125	0.000966438	0.00999241
	REACTOME_ERYTHROPOIETIN_ACTIVATES_RAS	1.59402	14	0.00100325	0.0101508
	REACTOME_MUSCLE_CONTRACTION	1.23749	188	0.00100325	0.0101508
	REACTOME_SELENOAMINO_ACID_METABOLISM	1.29086	112	0.00100325	0.0101508
	REACTOME_SIGNALLING_TO_ERKS	1.47787	34	0.00100325	0.0101508
	REACTOME_SUMOYLATION_OF_DNA_DAMAGE_RESPONSE_AND_REPAIR_PROTEINS	1.35557	72	0.00100325	0.0101508
	WP_EXERCISEINDUCED_CIRCADIAN_REGULATION	1.40064	47	0.00100325	0.0101508
	REACTOME_ENERGY_DEPENDENT_REGULATION_OF_MTOR_BY_LKB1_AMPK	1.47849	28	0.00102166	0.0102637
	REACTOME_NUCLEOTIDE_BINDING_DOMAIN_LEUCINE_RICH_REPEAT_CONTAINING_RECEPTOR_NLR_SIGNALING_PATHWAYS	1.38839	52	0.00102166	0.0102637
	BIOCARTA_TOLL_PATHWAY	1.53185	21	0.00104007	0.0104117
	BIOCARTA_LONGEVITY_PATHWAY	1.5902	15	0.00105848	0.0105587
	REACTOME_HOMOLOGY_DIRECTED_REPAIR	1.27907	118	0.00107689	0.01063
	WP_ENERGY_METABOLISM	1.39907	47	0.00107689	0.01063
	WP_SIGNAL_TRANSDUCTION_THROUGH_IL1R	1.46721	31	0.00107689	0.01063
	PID_FCER1_PATHWAY	1.38581	57	0.00109529	0.0106631
	REACTOME_G2_M_CHECKPOINTS	1.24833	146	0.00109529	0.0106631
	REACTOME_HEME_SIGNALING	1.39898	47	0.00109529	0.0106631
	REACTOME_PLATELET_HOMEOSTASIS	1.32402	83	0.00109529	0.0106631
	PID_P38_ALPHA_BETA_PATHWAY	1.49467	29	0.0011137	0.0106953
	WP_CILIOPATHIES	1.24454	176	0.0011137	0.0106953
	WP_P38_MAPK_SIGNALING_PATHWAY	1.45677	33	0.0011137	0.0106953
	WP_REGUCALCIN_IN_PROXIMAL_TUBULE_EPITHELIAL_KIDNEY_CELLS	1.47228	32	0.0011137	0.0106953
	BIOCARTA_PKC_PATHWAY	1.66885	7	0.00113211	0.0107626
	PID_EPO_PATHWAY	1.47032	32	0.00113211	0.0107626
	REACTOME_METABOLISM_OF_NUCLEOTIDES	1.30694	94	0.00113211	0.0107626
	BIOCARTA_HIVNEF_PATHWAY	1.37146	55	0.00115052	0.0107928
	REACTOME_MTOR_SIGNALLING	1.44253	40	0.00115052	0.0107928
	WP_KISSPEPTINKISSPEPTIN_RECEPTOR_SYSTEM_IN_THE_OVARY	1.43561	38	0.00115052	0.0107928
	WP_LEPTIN_SIGNALING_PATHWAY	1.35076	72	0.00115052	0.0107928
	BIOCARTA_ACE2_PATHWAY	1.65821	9	0.00118733	0.0111014
	REACTOME_FCERI_MEDIATED_MAPK_ACTIVATION	1.46934	32	0.00120574	0.0112364
	REACTOME_ALPHA_LINOLENIC_OMEGA3_AND_LINOLEIC_OMEGA6_ACID_METABOLISM	1.5976	12	0.00126096	0.0117125
	REACTOME_NEUREXINS_AND_NEUROLIGINS	1.39415	50	0.00127937	0.0118446
	BIOCARTA_FMLP_PATHWAY	1.45206	33	0.00129778	0.0118984
	BIOCARTA_HCMV_PATHWAY	1.55807	17	0.00129778	0.0118984
	REACTOME_RETROGRADE_TRANSPORT_AT_THE_TRANS_GOLGI_NETWORK	1.39169	47	0.00129778	0.0118984
	REACTOME_DOWNSTREAM_SIGNALING_OF_ACTIVATED_FGFR2	1.46864	28	0.00131619	0.0119896
	REACTOME_SHC_MEDIATED_CASCADE_FGFR1	1.54862	20	0.00131619	0.0119896
	REACTOME_FRS_MEDIATED_FGFR1_SIGNALING	1.50211	22	0.0013346	0.0121183
	REACTOME_EXTRA_NUCLEAR_ESTROGEN_SIGNALING	1.33538	74	0.001353	0.0122462
	REACTOME_SIGNALING_BY_FGFR_IN_DISEASE	1.36165	61	0.00138982	0.0125394
	REACTOME_NEGATIVE_EPIGENETIC_REGULATION_OF_RRNA_EXPRESSION	1.33439	74	0.00140823	0.012625
	WP_KIT_RECEPTOR_SIGNALING_PATHWAY	1.3791	57	0.00140823	0.012625
	REACTOME_POTENTIAL_THERAPEUTICS_FOR_SARS	1.31797	77	0.00142664	0.0127096
	WP_FRAGILE_X_SYNDROME	1.27867	114	0.00142664	0.0127096
	REACTOME_FCERI_MEDIATED_NF_KB_ACTIVATION	1.31682	77	0.00144504	0.0128333
	KEGG_LONG_TERM_DEPRESSION	1.33733	68	0.00146345	0.0128756
	REACTOME_DOWNSTREAM_SIGNALING_OF_ACTIVATED_FGFR1	1.49713	30	0.00146345	0.0128756
	REACTOME_RHOB_GTPASE_CYCLE	1.34202	67	0.00146345	0.0128756
	REACTOME_APOPTOSIS	1.22569	173	0.00148186	0.0129972
	PID_REG_GR_PATHWAY	1.32226	81	0.00150027	0.0131181
	BIOCARTA_AKT_PATHWAY	1.54013	20	0.00151868	0.0132382
	PID_FOXO_PATHWAY	1.37144	48	0.00153708	0.0133167
	WP_INHIBITION_OF_EXOSOME_BIOGENESIS_AND_SECRETION_BY_MANUMYCIN_A_IN_CRPC_CELLS	1.55055	17	0.00153708	0.0133167
	REACTOME_FATTY_ACID_METABOLISM	1.23184	168	0.00155549	0.0133537
	REACTOME_INTERLEUKIN_17_SIGNALING	1.34917	65	0.00155549	0.0133537
	REACTOME_SIGNALING_BY_FGFR2	1.34734	71	0.00155549	0.0133537
	SIG_INSULIN_RECEPTOR_PATHWAY_IN_CARDIAC_MYOCYTES	1.36904	48	0.0015739	0.0134709
	KEGG_NOD_LIKE_RECEPTOR_SIGNALING_PATHWAY	1.37654	57	0.00161071	0.0137444
	REACTOME_NEGATIVE_REGULATION_OF_THE_PI3K_AKT_NETWORK	1.27623	109	0.00166594	0.0141306
	WP_TRANSLATION_INHIBITORS_IN_CHRONICALLY_ACTIVATED_PDGFRA_CELLS	1.38385	45	0.00166594	0.0141306
	REACTOME_RND2_GTPASE_CYCLE	1.41501	41	0.00168435	0.014244
	REACTOME_IKBA_VARIANT_LEADS_TO_EDA_ID	1.67483	6	0.00170275	0.0143143
	REACTOME_SUMOYLATION_OF_TRANSCRIPTION_COFACTORS	1.44111	42	0.00170275	0.0143143
	PID_E2F_PATHWAY	1.32941	70	0.00172116	0.01441
	REACTOME_NONSENSE_MEDIATED_DECAY_NMD	1.30336	106	0.00173957	0.01441
	REACTOME_THE_ACTIVATION_OF_ARYLSULFATASES	1.64377	8	0.00173957	0.01441
	WP_IL4_SIGNALING_PATHWAY	1.37862	51	0.00173957	0.01441
	WP_RETINOBLASTOMA_GENE_IN_CANCER	1.29394	82	0.00173957	0.01441
	BIOCARTA_IL1R_PATHWAY	1.47346	29	0.00175798	0.01452
	REACTOME_DOWNSTREAM_SIGNAL_TRANSDUCTION	1.47261	29	0.00177639	0.0146294
	REACTOME_RESPONSE_OF_EIF2AK4_GCN2_TO_AMINO_ACID_DEFICIENCY	1.29827	95	0.00179479	0.0147381
	REACTOME_SOS_MEDIATED_SIGNALLING	1.64387	7	0.0018132	0.0148463
	REACTOME_RHOC_GTPASE_CYCLE	1.34329	71	0.00183161	0.0149538
	REACTOME_MAP2K_AND_MAPK_ACTIVATION	1.41179	38	0.00185002	0.0150175
	REACTOME_SIGNALING_BY_ERBB2_ECD_MUTANTS	1.56791	16	0.00185002	0.0150175
	REACTOME_REGULATION_OF_PTEN_STABILITY_AND_ACTIVITY	1.33209	67	0.00186843	0.0151236
	PID_ANGIOPOIETIN_RECEPTOR_PATHWAY	1.37826	47	0.00190542	0.0153354
	PID_PI3K_PLC_TRK_PATHWAY	1.4343	36	0.00190542	0.0153354
	PID_P53_DOWNSTREAM_PATHWAY	1.25655	135	0.00197942	0.0158409
	REACTOME_PI3K_AKT_SIGNALING_IN_CANCER	1.30714	102	0.00197942	0.0158409
	REACTOME_REGULATION_OF_MRNA_STABILITY_BY_PROTEINS_THAT_BIND_AU_RICH_ELEMENTS	1.29897	84	0.00201642	0.0160014
	REACTOME_SIGNALING_BY_THE_B_CELL_RECEPTOR_BCR	1.29502	104	0.00201642	0.0160014
	REACTOME_THE_CITRIC_ACID_TCA_CYCLE_AND_RESPIRATORY_ELECTRON_TRANSPORT	1.2412	157	0.00201642	0.0160014
	REACTOME_BMAL1_CLOCK_NPAS2_ACTIVATES_CIRCADIAN_GENE_EXPRESSION	1.49277	26	0.00205341	0.0162495
	REACTOME_CLEC7A_DECTIN_1_SIGNALING	1.29527	95	0.00209041	0.0164048
	REACTOME_DNA_REPLICATION	1.25584	124	0.00209041	0.0164048
	REACTOME_SIGNALING_BY_PDGFR_IN_DISEASE	1.5305	20	0.00209041	0.0164048
	REACTOME_SHC_RELATED_EVENTS_TRIGGERED_BY_IGF1R	1.63065	9	0.00216441	0.0167993
	REACTOME_TCR_SIGNALING	1.26969	112	0.00216441	0.0167993
	WP_EUKARYOTIC_TRANSCRIPTION_INITIATION	1.42118	40	0.00216441	0.0167993
	WP_NOVEL_INTRACELLULAR_COMPONENTS_OF_RIGILIKE_RECEPTOR_RLR_PATHWAY	1.35156	55	0.00216441	0.0167993
	REACTOME_RNA_POLYMERASE_I_TRANSCRIPTION	1.32097	76	0.0022014	0.0170398
	REACTOME_EUKARYOTIC_TRANSLATION_INITIATION	1.26787	112	0.0022384	0.017279
	REACTOME_TRANSPORT_OF_MATURE_TRANSCRIPT_TO_CYTOPLASM	1.30209	77	0.0022754	0.0175169
	KEGG_BASAL_TRANSCRIPTION_FACTORS	1.4527	29	0.0023124	0.0176103
	REACTOME_PROTEIN_FOLDING	1.28957	95	0.0023124	0.0176103
	REACTOME_TOLL_LIKE_RECEPTOR_TLR1_TLR2_CASCADE	1.27074	97	0.0023124	0.0176103
	WP_GLYCEROPHOSPHOLIPID_BIOSYNTHETIC_PATHWAY	1.45423	29	0.0023124	0.0176103
	REACTOME_AMINO_ACIDS_REGULATE_MTORC1	1.35748	53	0.00234939	0.0177963
	WP_MAPK_PATHWAY_IN_CONGENITAL_THYROID_CANCER	1.5424	15	0.00234939	0.0177963
	BIOCARTA_DEATH_PATHWAY	1.4431	28	0.00238639	0.0180284
	WP_CHOLESTEROL_METABOLISM_INCLUDES_BOTH_BLOCH_AND_KANDUTSCHRUSSELL_PATHWAYS	1.42291	43	0.00246039	0.018538
	REACTOME_GLYCEROPHOSPHOLIPID_BIOSYNTHESIS	1.25113	124	0.00253438	0.0189945
	WP_MIRNA_REGULATION_OF_DNA_DAMAGE_RESPONSE	1.33422	71	0.00253438	0.0189945
	BIOCARTA_RACCYCD_PATHWAY	1.46082	25	0.00257138	0.01912
	PID_CXCR3_PATHWAY	1.40185	41	0.00257138	0.01912
	WP_FLUOROPYRIMIDINE_ACTIVITY	1.42266	33	0.00257138	0.01912
	PID_BMP_PATHWAY	1.40157	41	0.00260838	0.0193443
	WP_TCELL_ANTIGEN_RECEPTOR_TCR_SIGNALING_PATHWAY	1.30507	86	0.00268237	0.0198412
	REACTOME_TRANSCRIPTIONAL_REGULATION_BY_E2F6	1.41972	31	0.00271937	0.0200624
	KEGG_TGF_BETA_SIGNALING_PATHWAY	1.29169	85	0.00275637	0.0202826
	PID_ERBB2_ERBB3_PATHWAY	1.39397	44	0.00279337	0.0205016
	BIOCARTA_NPP1_PATHWAY	1.62388	8	0.00283036	0.0207194
	REACTOME_CHROMOSOME_MAINTENANCE	1.26581	111	0.00286736	0.0207755
	REACTOME_STIMULI_SENSING_CHANNELS	1.27141	100	0.00286736	0.0207755
	REACTOME_TNF_SIGNALING	1.41009	40	0.00286736	0.0207755
	WP_DNA_DAMAGE_RESPONSE	1.31856	66	0.00286736	0.0207755
	PID_EPHA_FWDPATHWAY	1.41425	33	0.00290436	0.0209365
	REACTOME_POST_TRANSLATIONAL_MODIFICATION_SYNTHESIS_OF_GPI_ANCHORED_PROTEINS	1.29053	84	0.00290436	0.0209365
	BIOCARTA_MET_PATHWAY	1.43285	32	0.00294136	0.0210959
	WP_PATHWAYS_REGULATING_HIPPO_SIGNALING	1.26379	97	0.00294136	0.0210959
	KEGG_RIBOSOME	1.2784	82	0.00297835	0.0212536
	REACTOME_FCGAMMA_RECEPTOR_FCGR_DEPENDENT_PHAGOCYTOSIS	1.28392	83	0.00297835	0.0212536
	WP_FAS_LIGAND_FASL_PATHWAY_AND_STRESS_INDUCTION_OF_HEAT_SHOCK_PROTEINS_HSP_REGULATION	1.41965	42	0.00301535	0.0214635
	REACTOME_CLATHRIN_MEDIATED_ENDOCYTOSIS	1.23469	139	0.00305235	0.0215107
	REACTOME_COPI_DEPENDENT_GOLGI_TO_ER_RETROGRADE_TRAFFIC	1.27467	96	0.00305235	0.0215107
	REACTOME_EPH_EPHRIN_SIGNALING	1.28389	89	0.00305235	0.0215107
	REACTOME_EPIGENETIC_REGULATION_OF_GENE_EXPRESSION	1.26223	111	0.00305235	0.0215107
	REACTOME_C_TYPE_LECTIN_RECEPTORS_CLRS	1.2567	134	0.00308935	0.0216102
	SIG_CD40PATHWAYMAP	1.41037	33	0.00308935	0.0216102
	WP_BIOMARKERS_FOR_PYRIMIDINE_METABOLISM_DISORDERS	1.52707	15	0.00308935	0.0216102
	BIOCARTA_CALCINEURIN_PATHWAY	1.51394	17	0.00316334	0.0219651
	REACTOME_SIGNALING_BY_TGF_BETA_RECEPTOR_COMPLEX	1.32809	71	0.00316334	0.0219651
	REACTOME_SUMO_IS_CONJUGATED_TO_E1_UBA2_SAE1	1.67151	5	0.00316334	0.0219651
	REACTOME_HATS_ACETYLATE_HISTONES	1.2681	100	0.00320034	0.0221676
	REACTOME_ACTIVATION_OF_RAC1	1.55251	12	0.00323734	0.0222606
	REACTOME_P38MAPK_EVENTS	1.57056	13	0.00323734	0.0222606
	WP_PROTEASOME_DEGRADATION	1.33626	58	0.00323734	0.0222606
	REACTOME_MHC_CLASS_II_ANTIGEN_PRESENTATION	1.25584	120	0.00327434	0.0224605
	KEGG_ONE_CARBON_POOL_BY_FOLATE	1.50952	17	0.00331133	0.0226048
	REACTOME_UCH_PROTEINASES	1.29467	90	0.00331133	0.0226048
	KEGG_GALACTOSE_METABOLISM	1.44881	25	0.00334833	0.0227478
	KEGG_TYPE_II_DIABETES_MELLITUS	1.37873	46	0.00334833	0.0227478
	PID_SMAD2_3NUCLEAR_PATHWAY	1.31615	75	0.00338533	0.0228893
	PID_TRKR_PATHWAY	1.34114	60	0.00338533	0.0228893
	REACTOME_SMOOTH_MUSCLE_CONTRACTION	1.3827	38	0.00342233	0.0230844
	REACTOME_DEADENYLATION_DEPENDENT_MRNA_DECAY	1.33163	55	0.00345932	0.0232785
	WP_G13_SIGNALING_PATHWAY	1.41249	36	0.00349632	0.0234718
	KEGG_VEGF_SIGNALING_PATHWAY	1.30503	76	0.00353332	0.0236641
	BIOCARTA_IGF1R_PATHWAY	1.46824	23	0.00357032	0.0238554
	BIOCARTA_HSP27_PATHWAY	1.53261	14	0.00360732	0.0239895
	REACTOME_PEROXISOMAL_PROTEIN_IMPORT	1.33006	62	0.00360732	0.0239895
	REACTOME_SRP_DEPENDENT_COTRANSLATIONAL_PROTEIN_TARGETING_TO_MEMBRANE	1.28137	106	0.00364431	0.0241788
	BIOCARTA_CCR3_PATHWAY	1.50638	17	0.00368131	0.0242538
	PID_NFAT_3PATHWAY	1.33559	53	0.00368131	0.0242538
	REACTOME_DDX58_IFIH1_MEDIATED_INDUCTION_OF_INTERFERON_ALPHA_BETA	1.27949	78	0.00368131	0.0242538
	BIOCARTA_GLEEVEC_PATHWAY	1.46543	23	0.00371831	0.0243279
	REACTOME_PROCESSING_OF_DNA_DOUBLE_STRAND_BREAK_ENDS	1.27743	78	0.00371831	0.0243279
	WP_ENDODERM_DIFFERENTIATION	1.24429	132	0.00371831	0.0243279
	REACTOME_RET_SIGNALING	1.39734	40	0.00375531	0.0244009
	REACTOME_TP53_REGULATES_METABOLIC_GENES	1.28411	80	0.00375531	0.0244009
	WP_INTEGRATED_CANCER_PATHWAY	1.38206	44	0.00375531	0.0244009
	REACTOME_NUCLEAR_EVENTS_KINASE_AND_TRANSCRIPTION_FACTOR_ACTIVATION	1.32015	59	0.00382967	0.0246019
	REACTOME_SUMOYLATION_OF_CHROMATIN_ORGANIZATION_PROTEINS	1.33119	58	0.00382967	0.0246019
	WP_CANNABINOID_RECEPTOR_SIGNALING	1.43417	29	0.00382967	0.0246019
	WP_ESC_PLURIPOTENCY_PATHWAYS	1.25868	110	0.00382967	0.0246019
	WP_FACTORS_AND_PATHWAYS_AFFECTING_INSULINLIKE_GROWTH_FACTOR_IGF1AKT_SIGNALING	1.39496	37	0.00382967	0.0246019
	REACTOME_PI3K_AKT_ACTIVATION	1.59841	9	0.00390403	0.0248542
	REACTOME_THE_ROLE_OF_GTSE1_IN_G2_M_PROGRESSION_AFTER_G2_CHECKPOINT	1.31039	75	0.00390403	0.0248542
	WP_ATM_SIGNALING_PATHWAY	1.37633	38	0.00390403	0.0248542
	WP_BENZOAPYRENE_METABOLISM	1.59677	9	0.00390403	0.0248542
	REACTOME_ACTIVATION_OF_GENE_EXPRESSION_BY_SREBF_SREBP	1.39313	40	0.00397839	0.0249906
	SA_PROGRAMMED_CELL_DEATH	1.57609	11	0.00397839	0.0249906
	WP_HEMATOPOIETIC_STEM_CELL_GENE_REGULATION_BY_GABP_ALPHABETA_COMPLEX	1.50225	19	0.00397839	0.0249906
	WP_PARKINUBIQUITIN_PROTEASOMAL_SYSTEM_PATHWAY	1.30956	66	0.00397839	0.0249906
	WP_SIGNALING_OF_HEPATOCYTE_GROWTH_FACTOR_RECEPTOR	1.39479	33	0.00397839	0.0249906
	WP_WNT_SIGNALING	1.25439	111	0.00397839	0.0249906
	REACTOME_INWARDLY_RECTIFYING_K_CHANNELS	1.40316	35	0.00405275	0.0252895
	REACTOME_REGULATION_OF_TP53_EXPRESSION_AND_DEGRADATION	1.38957	37	0.00405275	0.0252895
	WP_EXTRACELLULAR_VESICLEMEDIATED_SIGNALING_IN_RECIPIENT_CELLS	1.45601	30	0.00405275	0.0252895
	REACTOME_ACTIVATED_NTRK2_SIGNALS_THROUGH_RAS	1.59528	9	0.00412711	0.0256406
	REACTOME_EICOSANOID_LIGAND_BINDING_RECEPTORS	1.52733	14	0.00412711	0.0256406
	KEGG_TIGHT_JUNCTION	1.23665	130	0.00420147	0.0259319
	PID_ERA_GENOMIC_PATHWAY	1.33193	63	0.00420147	0.0259319
	PID_RHOA_PATHWAY	1.37863	44	0.00420147	0.0259319
	BIOCARTA_TRKA_PATHWAY	1.52525	14	0.00427583	0.0261065
	REACTOME_INTERLEUKIN_1_FAMILY_SIGNALING	1.23829	134	0.00427583	0.0261065
	REACTOME_SYNTHESIS_OF_ACTIVE_UBIQUITIN_ROLES_OF_E1_AND_E2_ENZYMES	1.43463	27	0.00427583	0.0261065
	SIG_BCR_SIGNALING_PATHWAY	1.35637	45	0.00427583	0.0261065
	WP_NONALCOHOLIC_FATTY_LIVER_DISEASE	1.2081	147	0.00427583	0.0261065
	NABA_ECM_GLYCOPROTEINS	1.19583	185	0.00435019	0.0263899
	PID_TCR_JNK_PATHWAY	1.52467	14	0.00435019	0.0263899
	REACTOME_REGULATION_OF_TP53_ACTIVITY_THROUGH_ACETYLATION	1.4179	28	0.00435019	0.0263899
	REACTOME_ASSEMBLY_OF_THE_PRE_REPLICATIVE_COMPLEX	1.30348	66	0.00442455	0.0266697
	REACTOME_NUCLEAR_ENVELOPE_NE_REASSEMBLY	1.30062	73	0.00442455	0.0266697
	WP_INTEGRINMEDIATED_CELL_ADHESION	1.25447	97	0.00442455	0.0266697
	BIOCARTA_CIRCADIAN_PATHWAY	1.6311	6	0.00449891	0.0267761
	BIOCARTA_INSULIN_PATHWAY	1.48752	20	0.00449891	0.0267761
	BIOCARTA_SUMO_PATHWAY	1.63235	6	0.00449891	0.0267761
	PID_FANCONI_PATHWAY	1.35407	45	0.00449891	0.0267761
	REACTOME_REGULATION_OF_HMOX1_EXPRESSION_AND_ACTIVITY	1.32811	63	0.00449891	0.0267761
	REACTOME_RHOQ_GTPASE_CYCLE	1.32661	56	0.00449891	0.0267761
	PID_AR_PATHWAY	1.33497	57	0.00457327	0.0268798
	PID_BCR_5PATHWAY	1.32814	60	0.00457327	0.0268798
	REACTOME_DARPP_32_EVENTS	1.4545	24	0.00457327	0.0268798
	REACTOME_MET_ACTIVATES_RAS_SIGNALING	1.56652	11	0.00457327	0.0268798
	REACTOME_PROLONGED_ERK_ACTIVATION_EVENTS	1.52083	14	0.00457327	0.0268798
	WP_BDNFTRKB_SIGNALING	1.38678	33	0.00457327	0.0268798
	PID_PI3KCI_AKT_PATHWAY	1.41224	34	0.00464763	0.0271479
	REACTOME_SYNTHESIS_OF_PIPS_AT_THE_EARLY_ENDOSOME_MEMBRANE	1.51062	15	0.00464763	0.0271479
	WP_OXIDATIVE_DAMAGE	1.38879	40	0.00464763	0.0271479
	KEGG_RNA_DEGRADATION	1.32084	55	0.00472199	0.0273566
	PID_CIRCADIAN_PATHWAY	1.51936	14	0.00472199	0.0273566
	REACTOME_CONSTITUTIVE_SIGNALING_BY_EGFRVIII	1.50991	15	0.00472199	0.0273566
	REACTOME_EUKARYOTIC_TRANSLATION_ELONGATION	1.27376	88	0.00472199	0.0273566
	BIOCARTA_NDKDYNAMIN_PATHWAY	1.4969	17	0.00479635	0.027618
	REACTOME_AMINO_ACID_TRANSPORT_ACROSS_THE_PLASMA_MEMBRANE	1.41959	29	0.00479635	0.027618
	WP_22Q112_COPY_NUMBER_VARIATION_SYNDROME	1.22244	131	0.00479635	0.027618
	REACTOME_GLYCOSPHINGOLIPID_METABOLISM	1.38118	39	0.00487071	0.0279326
	WP_STRUCTURAL_PATHWAY_OF_INTERLEUKIN_1_IL1	1.35121	45	0.00487071	0.0279326
	PID_ARF6_TRAFFICKING_PATHWAY	1.32982	48	0.00494507	0.0282447
	SIG_REGULATION_OF_THE_ACTIN_CYTOSKELETON_BY_RHO_GTPASES	1.39571	31	0.00494507	0.0282447
	BIOCARTA_BCR_PATHWAY	1.39543	31	0.00501943	0.0283833
	KEGG_PATHOGENIC_ESCHERICHIA_COLI_INFECTION	1.32739	53	0.00501943	0.0283833
	REACTOME_RNA_POLYMERASE_I_TRANSCRIPTION_INITIATION	1.36634	44	0.00501943	0.0283833
	REACTOME_RND3_GTPASE_CYCLE	1.36897	41	0.00501943	0.0283833
	WP_PATHOGENIC_ESCHERICHIA_COLI_INFECTION	1.32739	53	0.00501943	0.0283833
	BIOCARTA_TNFR2_PATHWAY	1.50199	15	0.00509379	0.0287464
	PID_MAPK_TRK_PATHWAY	1.38023	33	0.00524251	0.02941
	REACTOME_GOLGI_ASSOCIATED_VESICLE_BIOGENESIS	1.33067	51	0.00524251	0.02941
	REACTOME_RNA_POLYMERASE_I_TRANSCRIPTION_TERMINATION	1.41479	29	0.00524251	0.02941
	BIOCARTA_FLUMAZENIL_PATHWAY	1.58628	8	0.00531688	0.029651
	REACTOME_ANTIVIRAL_MECHANISM_BY_IFN_STIMULATED_GENES	1.27368	80	0.00531688	0.029651
	REACTOME_PROCESSING_AND_ACTIVATION_OF_SUMO	1.54039	10	0.00531688	0.029651
	REACTOME_DOWNSTREAM_SIGNALING_OF_ACTIVATED_FGFR3	1.44797	23	0.00539124	0.0297147
	REACTOME_FACTORS_INVOLVED_IN_MEGAKARYOCYTE_DEVELOPMENT_AND_PLATELET_PRODUCTION	1.21632	157	0.00539124	0.0297147
	REACTOME_SPHINGOLIPID_DE_NOVO_BIOSYNTHESIS	1.34673	45	0.00539124	0.0297147
	WP_INITIATION_OF_TRANSCRIPTION_AND_TRANSLATION_ELONGATION_AT_THE_HIV1_LTR	1.39172	31	0.00539124	0.0297147
	WP_MITOCHONDRIAL_GENE_EXPRESSION	1.48603	17	0.00539124	0.0297147
	WP_SIMPLIFIED_INTERACTION_MAP_BETWEEN_LOXL4_AND_OXIDATIVE_STRESS_PATHWAY	1.48906	17	0.00539124	0.0297147
	WP_7Q1123_COPY_NUMBER_VARIATION_SYNDROME	1.28211	90	0.0054656	0.0300661
	REACTOME_ACTIVATION_OF_AMPK_DOWNSTREAM_OF_NMDARS	1.41624	27	0.00561432	0.0305285
	REACTOME_DEGRADATION_OF_BETA_CATENIN_BY_THE_DESTRUCTION_COMPLEX	1.26461	82	0.00561432	0.0305285
	REACTOME_RAS_SIGNALING_DOWNSTREAM_OF_NF1_LOSS_OF_FUNCTION_VARIANTS	1.58169	7	0.00561432	0.0305285
	REACTOME_SIGNALING_BY_PDGFRA_TRANSMEMBRANE_JUXTAMEMBRANE_AND_KINASE_DOMAIN_MUTANTS	1.52296	12	0.00561432	0.0305285
	WP_RAS_AND_BRADYKININ_PATHWAYS_IN_COVID19	1.41727	27	0.00561432	0.0305285
	WP_TNF_RELATED_WEAK_INDUCER_OF_APOPTOSIS_TWEAK_SIGNALING_PATHWAY	1.38127	40	0.00561432	0.0305285
	REACTOME_DEFECTIVE_CFTR_CAUSES_CYSTIC_FIBROSIS	1.30134	59	0.00568868	0.0306972
	REACTOME_N_GLYCAN_TRIMMING_IN_THE_ER_AND_CALNEXIN_CALRETICULIN_CYCLE	1.38833	35	0.00568868	0.0306972
	WP_AIRWAY_SMOOTH_MUSCLE_CELL_CONTRACTION	1.50498	16	0.00568868	0.0306972
	WP_THYROID_HORMONES_PRODUCTION_AND_THEIR_PERIPHERAL_DOWNSTREAM_SIGNALLING_EFFECTS	1.25456	92	0.00568868	0.0306972
	REACTOME_OPIOID_SIGNALLING	1.26422	89	0.00576304	0.0309804
	REACTOME_TRANSCRIPTIONAL_REGULATION_BY_RUNX3	1.24834	93	0.00576304	0.0309804
	REACTOME_G1_S_DNA_DAMAGE_CHECKPOINTS	1.29467	66	0.0058374	0.0311438
	REACTOME_TRANSCRIPTIONAL_REGULATION_BY_RUNX2	1.23655	116	0.0058374	0.0311438
	REACTOME_TRANSCRIPTIONAL_REGULATION_BY_SMALL_RNAS	1.28763	74	0.0058374	0.0311438
	WP_GENOTOXICITY_PATHWAY	1.32556	57	0.0058374	0.0311438
	REACTOME_CARBOXYTERMINAL_POST_TRANSLATIONAL_MODIFICATIONS_OF_TUBULIN	1.3888	42	0.00591176	0.0314812
	REACTOME_RESPONSE_TO_ELEVATED_PLATELET_CYTOSOLIC_CA2	1.23004	122	0.00598612	0.0318174
	KEGG_RIG_I_LIKE_RECEPTOR_SIGNALING_PATHWAY	1.29047	66	0.00606048	0.0320922
	WP_PYRIMIDINE_METABOLISM_AND_RELATED_DISEASES	1.50068	16	0.00606048	0.0320922
	REACTOME_DECTIN_1_MEDIATED_NONCANONICAL_NF_KB_SIGNALING	1.29827	59	0.00613484	0.0324254
	REACTOME_CELL_CELL_COMMUNICATION	1.23754	126	0.00628357	0.033088
	WP_NEOVASCULARISATION_PROCESSES	1.36305	37	0.00628357	0.033088
	BIOCARTA_IGF1_PATHWAY	1.47057	20	0.00643229	0.0337457
	WP_MAMMARY_GLAND_DEVELOPMENT_PATHWAY_PREGNANCY_AND_LACTATION_STAGE_3_OF_4	1.38223	31	0.00643229	0.0337457
	REACTOME_DISORDERS_OF_TRANSMEMBRANE_TRANSPORTERS	1.20508	166	0.00650665	0.0340098
	REACTOME_TNFR1_INDUCED_NFKAPPAB_SIGNALING_PATHWAY	1.41153	27	0.00650665	0.0340098
	BIOCARTA_ALK_PATHWAY	1.36154	37	0.00658101	0.0342721
	PID_INSULIN_GLUCOSE_PATHWAY	1.43747	26	0.00658101	0.0342721
	REACTOME_AGGREPHAGY	1.35353	41	0.00665537	0.0344692
	REACTOME_RECYCLING_OF_EIF2_GDP	1.56936	7	0.00665537	0.0344692
	REACTOME_RHOD_GTPASE_CYCLE	1.31953	48	0.00665537	0.0344692
	KEGG_ARGININE_AND_PROLINE_METABOLISM	1.31914	48	0.00672973	0.0347274
	WP_PRADERWILLI_AND_ANGELMAN_SYNDROME	1.30984	58	0.00672973	0.0347274
	BIOCARTA_NOS1_PATHWAY	1.46694	20	0.00680409	0.0350473
	REACTOME_SIGNAL_ATTENUATION	1.52814	10	0.00687845	0.035366
	KEGG_LEUKOCYTE_TRANSENDOTHELIAL_MIGRATION	1.24007	109	0.00695281	0.0354268
	PID_NEPHRIN_NEPH1_PATHWAY	1.37848	31	0.00695281	0.0354268
	REACTOME_SIGNALING_BY_FGFR3	1.34922	38	0.00695281	0.0354268
	WP_DNA_IRDOUBLE_STRAND_BREAKS_DSBS_AND_CELLULAR_RESPONSE_VIA_ATM	1.32915	54	0.00695281	0.0354268
	WP_TRANSSULFURATION_AND_ONE_CARBON_METABOLISM	1.37838	31	0.00695281	0.0354268
	PID_HDAC_CLASSI_PATHWAY	1.30936	61	0.00702717	0.0357414
	REACTOME_PINK1_PRKN_MEDIATED_MITOPHAGY	1.40813	22	0.00710154	0.0359262
	WP_COPPER_HOMEOSTASIS	1.31662	51	0.00710154	0.0359262
	WP_CORTICOTROPINRELEASING_HORMONE_SIGNALING_PATHWAY	1.27006	90	0.00710154	0.0359262
	REACTOME_RHO_GTPASES_ACTIVATE_NADPH_OXIDASES	1.407	22	0.0071759	0.0362376
	KEGG_THYROID_CANCER	1.39656	28	0.00725026	0.0363539
	REACTOME_CONDENSATION_OF_PROPHASE_CHROMOSOMES	1.34744	41	0.00725026	0.0363539
	WP_RELATIONSHIP_BETWEEN_INFLAMMATION_COX2_AND_EGFR	1.41672	25	0.00725026	0.0363539
	WP_WNT_SIGNALING_PATHWAY_NETPATH	1.3161	51	0.00725026	0.0363539
	REACTOME_INHIBITION_OF_DNA_RECOMBINATION_AT_TELOMERE	1.3658	43	0.00732462	0.0365973
	SA_B_CELL_RECEPTOR_COMPLEXES	1.40512	22	0.00732462	0.0365973
	BIOCARTA_BIOPEPTIDES_PATHWAY	1.3942	28	0.00739898	0.0366456
	KEGG_ADHERENS_JUNCTION	1.27991	72	0.00739898	0.0366456
	REACTOME_AQUAPORIN_MEDIATED_TRANSPORT	1.31486	51	0.00739898	0.0366456
	REACTOME_BIOSYNTHESIS_OF_THE_N_GLYCAN_PRECURSOR_DOLICHOL_LIPID_LINKED_OLIGOSACCHARIDE_LLO_AND_TRANSFER_TO_A_NASCENT_PROTEIN	1.28163	76	0.00739898	0.0366456
	REACTOME_INTERLEUKIN_7_SIGNALING	1.43308	26	0.00739898	0.0366456
	PID_REELIN_PATHWAY	1.40796	27	0.00747334	0.0368208
	REACTOME_DISEASES_ASSOCIATED_WITH_GLYCOSYLATION_PRECURSOR_BIOSYNTHESIS	1.48154	18	0.00747334	0.0368208
	REACTOME_ESTROGEN_STIMULATED_SIGNALING_THROUGH_PRKCZ	1.6136	6	0.00747334	0.0368208
	REACTOME_CELL_SURFACE_INTERACTIONS_AT_THE_VASCULAR_WALL	1.2115	131	0.0075477	0.0371226
	REACTOME_DNA_REPLICATION_PRE_INITIATION	1.27295	81	0.00769716	0.0375966
	REACTOME_RECRUITMENT_OF_NUMA_TO_MITOTIC_CENTROSOMES	1.25463	89	0.00769716	0.0375966
	REACTOME_RESOLUTION_OF_SISTER_CHROMATID_COHESION	1.24229	119	0.00769716	0.0375966
	WP_METAPATHWAY_BIOTRANSFORMATION_PHASE_I_AND_II	1.18875	177	0.00769716	0.0375966
	BIOCARTA_STRESS_PATHWAY	1.40242	22	0.00784661	0.0381294
	WP_APOPTOSIS	1.2496	83	0.00784661	0.0381294
	WP_OMEGA3OMEGA6_FA_SYNTHESIS	1.51652	13	0.00784661	0.0381294
	REACTOME_NEGATIVE_REGULATORS_OF_DDX58_IFIH1_SIGNALING	1.38507	32	0.00799607	0.0387228
	REACTOME_STABILIZATION_OF_P53	1.29866	55	0.00799607	0.0387228
	KEGG_FOLATE_BIOSYNTHESIS	1.53235	11	0.00814552	0.0390461
	PID_HIV_NEF_PATHWAY	1.38247	34	0.00814552	0.0390461
	REACTOME_METABOLISM_OF_POLYAMINES	1.29578	55	0.00814552	0.0390461
	REACTOME_NGF_STIMULATED_TRANSCRIPTION	1.33929	38	0.00814552	0.0390461
	REACTOME_PHASE_1_INACTIVATION_OF_FAST_NA_CHANNELS	1.60711	6	0.00814552	0.0390461
	WP_NAD_METABOLISM_SIRTUINS_AND_AGING	1.53316	11	0.00814552	0.0390461
	WP_ENDOPLASMIC_RETICULUM_STRESS_RESPONSE_IN_CORONAVIRUS_INFECTION	1.332	45	0.00829498	0.0396954
	PID_IL2_PI3K_PATHWAY	1.35934	33	0.00844443	0.0398054
	REACTOME_CONSTITUTIVE_SIGNALING_BY_AKT1_E17K_IN_CANCER	1.4107	25	0.00844443	0.0398054
	REACTOME_HSP90_CHAPERONE_CYCLE_FOR_STEROID_HORMONE_RECEPTORS_SHR	1.32182	54	0.00844443	0.0398054
	REACTOME_REGULATION_OF_TNFR1_SIGNALING	1.38202	32	0.00844443	0.0398054
	REACTOME_SARS_COV_2_INFECTION	1.29281	65	0.00844443	0.0398054
	REACTOME_SIGNALING_BY_MRAS_COMPLEX_MUTANTS	1.55091	7	0.00844443	0.0398054
	REACTOME_SUMO_IS_TRANSFERRED_FROM_E1_TO_E2_UBE2I_UBC9	1.5517	7	0.00844443	0.0398054
	REACTOME_TRANS_GOLGI_NETWORK_VESICLE_BUDDING	1.28214	67	0.00844443	0.0398054
	WP_CANONICAL_NFKB_PATHWAY	1.55112	7	0.00844443	0.0398054
	BIOCARTA_GH_PATHWAY	1.39867	27	0.00859389	0.0403087
	REACTOME_NITRIC_OXIDE_STIMULATES_GUANYLATE_CYCLASE	1.3976	22	0.00859389	0.0403087
	REACTOME_P75_NTR_RECEPTOR_MEDIATED_SIGNALLING	1.25045	89	0.00859389	0.0403087
	PID_ALK1_PATHWAY	1.40881	25	0.00874334	0.040673
	REACTOME_GENE_SILENCING_BY_RNA	1.24577	106	0.00874334	0.040673
	REACTOME_PROLACTIN_RECEPTOR_SIGNALING	1.46698	15	0.00874334	0.040673
	WP_INSULIN_SIGNALLING_IN_HUMAN_ADIPOCYTES_DIABETIC_CONDITION	1.56084	8	0.00874334	0.040673
	WP_INSULIN_SIGNALLING_IN_HUMAN_ADIPOCYTES_NORMAL_CONDITION	1.56084	8	0.00874334	0.040673
	KEGG_ALZHEIMERS_DISEASE	1.19627	151	0.0088928	0.0412329
	WP_NEURAL_CREST_DIFFERENTIATION	1.24573	95	0.0088928	0.0412329
	REACTOME_RHO_GTPASES_ACTIVATE_FORMINS	1.21792	134	0.00904225	0.0418573
	REACTOME_SWITCHING_OF_ORIGINS_TO_A_POST_REPLICATIVE_STATE	1.24322	89	0.00919171	0.0424798
	BIOCARTA_PRC2_PATHWAY	1.4984	12	0.00934116	0.0428906
	KEGG_MTOR_SIGNALING_PATHWAY	1.33464	49	0.00934116	0.0428906
	PID_TCR_RAS_PATHWAY	1.50306	13	0.00934116	0.0428906
	REACTOME_DEGRADATION_OF_DVL	1.28928	55	0.00934116	0.0428906
	BIOCARTA_GPCR_PATHWAY	1.38584	28	0.00964007	0.0440489
	PID_ALK2_PATHWAY	1.52041	11	0.00964007	0.0440489
	REACTOME_RND1_GTPASE_CYCLE	1.33292	41	0.00964007	0.0440489
	REACTOME_CYCLIN_D_ASSOCIATED_EVENTS_IN_G1	1.33548	46	0.00978953	0.0444451
	REACTOME_NEGATIVE_REGULATION_OF_NOTCH4_SIGNALING	1.29681	52	0.00978953	0.0444451
	REACTOME_SIGNALING_BY_NTRK2_TRKB	1.41481	24	0.00978953	0.0444451
	WP_SEROTONIN_RECEPTOR_467_AND_NR3C_SIGNALING	1.45951	18	0.00978953	0.0444451
	BIOCARTA_RAC1_PATHWAY	1.4197	21	0.00993898	0.0447649
	REACTOME_REGULATION_OF_HSF1_MEDIATED_HEAT_SHOCK_RESPONSE	1.25163	80	0.00993898	0.0447649
	REACTOME_SUMOYLATION_OF_INTRACELLULAR_RECEPTORS	1.38038	29	0.00993898	0.0447649
	REACTOME_SYNTHESIS_OF_SUBSTRATES_IN_N_GLYCAN_BIOSYTHESIS	1.29863	62	0.00993898	0.0447649
	WP_3Q29_COPY_NUMBER_VARIATION_SYNDROME	1.26567	74	0.00993898	0.0447649
	REACTOME_ORC1_REMOVAL_FROM_CHROMATIN	1.2855	69	0.0100884	0.0452941
	REACTOME_SIGNALING_BY_TGF_BETA_RECEPTOR_COMPLEX_IN_CANCER	1.54993	8	0.0100884	0.0452941
	REACTOME_DOWNREGULATION_OF_SMAD2_3_SMAD4_TRANSCRIPTIONAL_ACTIVITY	1.39024	22	0.0102379	0.0457476
	REACTOME_GLUTATHIONE_CONJUGATION	1.35928	35	0.0102379	0.0457476
	REACTOME_MITOTIC_PROPHASE	1.22756	108	0.0102379	0.0457476
	BIOCARTA_TERC_PATHWAY	1.58378	6	0.0103874	0.0459803
	PID_SHP2_PATHWAY	1.28719	56	0.0103874	0.0459803
	REACTOME_ABORTIVE_ELONGATION_OF_HIV_1_TRANSCRIPT_IN_THE_ABSENCE_OF_TAT	1.42016	23	0.0103874	0.0459803
	REACTOME_REGULATION_OF_RUNX3_EXPRESSION_AND_ACTIVITY	1.29563	53	0.0103874	0.0459803
	REACTOME_SUMO_IS_PROTEOLYTICALLY_PROCESSED	1.58234	6	0.0103874	0.0459803
	REACTOME_TRANSCRIPTIONAL_REGULATION_OF_WHITE_ADIPOCYTE_DIFFERENTIATION	1.26082	81	0.0103874	0.0459803
	REACTOME_ACTIVATED_NTRK2_SIGNALS_THROUGH_FRS2_AND_FRS3	1.51254	11	0.0105368	0.0463521
	REACTOME_ACTIVATION_OF_PPARGC1A_PGC_1ALPHA_BY_PHOSPHORYLATION	1.50072	10	0.0105368	0.0463521
	REACTOME_SIGNALING_BY_MODERATE_KINASE_ACTIVITY_BRAF_MUTANTS	1.35182	43	0.0105368	0.0463521
	WP_ADIPOGENESIS	1.22291	128	0.0105368	0.0463521
	PID_ILK_PATHWAY	1.33006	44	0.0106863	0.0468641
	REACTOME_FANCONI_ANEMIA_PATHWAY	1.3288	38	0.0106863	0.0468641
	BIOCARTA_IL2RB_PATHWAY	1.36462	36	0.0108357	0.047446
	REACTOME_CARDIAC_CONDUCTION	1.21846	121	0.0109852	0.0478785
	REACTOME_RHO_GTPASES_ACTIVATE_IQGAPS	1.39541	30	0.0109852	0.0478785
	REACTOME_SIGNALING_BY_FGFR3_FUSIONS_IN_CANCER	1.49752	10	0.0109852	0.0478785
	BIOCARTA_ECM_PATHWAY	1.43054	19	0.0111346	0.048086
	BIOCARTA_GCR_PATHWAY	1.44199	17	0.0111346	0.048086
	PID_AVB3_OPN_PATHWAY	1.39344	30	0.0111346	0.048086
	REACTOME_FRS_MEDIATED_FGFR2_SIGNALING	1.41623	23	0.0111346	0.048086
	REACTOME_RAS_PROCESSING	1.41629	23	0.0111346	0.048086
	REACTOME_SYNTHESIS_OF_DIPHTHAMIDE_EEF2	1.54457	8	0.0111346	0.048086
	PID_IL3_PATHWAY	1.39314	25	0.0112841	0.0484361
	REACTOME_AKT_PHOSPHORYLATES_TARGETS_IN_THE_CYTOSOL	1.47002	14	0.0112841	0.0484361
	REACTOME_DISEASES_OF_GLYCOSYLATION	1.20422	135	0.0112841	0.0484361
	REACTOME_RAF_ACTIVATION	1.35058	33	0.0112841	0.0484361
	REACTOME_FORMATION_OF_TC_NER_PRE_INCISION_COMPLEX	1.29381	50	0.0114335	0.0488555
	REACTOME_SUMOYLATION_OF_RNA_BINDING_PROTEINS	1.31425	45	0.0114335	0.0488555
	WP_ENVELOPE_PROTEINS_AND_THEIR_POTENTIAL_ROLES_IN_EDMD_PHYSIOPATHOLOGY	1.32423	44	0.0114335	0.0488555
	BIOCARTA_GATA3_PATHWAY	1.46641	14	0.0117325	0.049907
	BIOCARTA_PLCE_PATHWAY	1.50685	11	0.0117325	0.049907
	REACTOME_SIGNALING_BY_FGFR1_IN_DISEASE	1.32858	37	0.0117325	0.049907

## Sheet: S6
	Supplementary Table 6 Results of analysis of multiomics datasets in Alzheimer's disease using pathwayMultiomics. A total of 74 pathways were significant at 5% false discovery rate. In pathways shaded in blue, DNAm and RNA pathway P-values were the smallest P-values; in pathways shaded in yellow, SNP and RNA pathway P-values were the smallest P-values; and in pathways shaded in green, SNP and DNAm…
			Single Omics P-values			Single Omics FDRs			pathwayMultiomics
	Pathway	Size	SNP	DNAm	RNASeq	SNP	DNAm	RNASeq	MiniMax	P-value	FDR	Contributing Omics
	PID_PDGFRB_PATHWAY	126	0.698842	0.000145345	0.000166645	0.999201	0.137255	0.00330019	0.000166645	8.33019e-08	0.000235994	DNAm, RNA
	WP_CHEMOKINE_SIGNALING_PATHWAY	155	0.818727	0.000317489	1.9408e-05	0.999201	0.138679	0.00089958	0.000317489	3.02334e-07	0.000328218	DNAm, RNA
	KEGG_HEMATOPOIETIC_CELL_LINEAGE	80	3.66747e-36	0.000340414	0.761239	3.23883e-34	0.138679	0.811053	0.000340414	3.47565e-07	0.000328218	SNP, DNAm
	PID_TCR_PATHWAY	58	0.000447836	0.0274765	0.000490003	0.0204127	0.643025	0.00654802	0.000490003	7.20075e-07	0.000509993	SNP, RNA
	WP_REGULATION_OF_TOLLLIKE_RECEPTOR_SIGNALING_PATHWAY	128	3.76266e-05	0.0332144	0.00065486	0.00208496	0.668278	0.007698	0.00065486	1.28596e-06	0.000568606	SNP, RNA
	KEGG_CHEMOKINE_SIGNALING_PATHWAY	172	0.789692	0.000671633	0.00029848	0.999201	0.147463	0.00469774	0.000671633	1.35267e-06	0.000568606	DNAm, RNA
	PID_KIT_PATHWAY	52	0.255483	0.000684495	0.000109986	0.999201	0.147463	0.00268612	0.000684495	1.40496e-06	0.000568606	DNAm, RNA
	WP_KIT_RECEPTOR_SIGNALING_PATHWAY	57	0.030529	0.000367704	0.00140823	0.594999	0.138679	0.012625	0.00140823	5.94373e-06	0.00210482	DNAm, RNA
	PID_CXCR4_PATHWAY	98	0.000487446	0.00150145	0.0729271	0.0218654	0.236311	0.155574	0.00150145	6.75625e-06	0.00212672	SNP, DNAm
	REACTOME_TCR_SIGNALING	112	6.05873e-52	0.207306	0.00216441	6.11499e-50	0.945684	0.0167993	0.00216441	1.40337e-05	0.00397574	SNP, RNA
	REACTOME_HATS_ACETYLATE_HISTONES	100	0.0031124	0.830961	0.00320034	0.11886	1	0.0221676	0.00320034	3.0661e-05	0.00715564	SNP, RNA
	REACTOME_MHC_CLASS_II_ANTIGEN_PRESENTATION	120	7.07021e-55	0.644242	0.00327434	7.68477e-53	1	0.0224605	0.00327434	3.20936e-05	0.00715564	SNP, RNA
	WP_INSULIN_SIGNALING	155	0.0870215	0.00331201	1.48024e-06	0.870933	0.427217	0.00019695	0.00331201	3.28356e-05	0.00715564	DNAm, RNA
	REACTOME_RAC1_GTPASE_CYCLE	170	0.0846204	0.00354674	2.79144e-08	0.870933	0.436866	3.82506e-05	0.00354674	3.76489e-05	0.00761446	DNAm, RNA
	REACTOME_DDX58_IFIH1_MEDIATED_INDUCTION_OF_INTERFERON_ALPHA_BETA	78	1.89685e-05	0.902914	0.00368131	0.00111677	1	0.0242538	0.00368131	4.05564e-05	0.00761446	SNP, RNA
	KEGG_NEUROTROPHIN_SIGNALING_PATHWAY	120	0.586535	0.00379092	3.45662e-06	0.999201	0.445281	0.000347789	0.00379092	4.30044e-05	0.00761446	DNAm, RNA
	WP_TRANSCRIPTION_FACTOR_REGULATION_IN_ADIPOGENESIS	22	0.837339	0.00394049	0.000764765	0.999201	0.445281	0.00849639	0.00394049	4.64601e-05	0.00774244	DNAm, RNA
	REACTOME_SUMOYLATION_OF_CHROMATIN_ORGANIZATION_PROTEINS	58	0.00448484	0.614539	0.00382967	0.156471	1	0.0246019	0.00448484	6.0161e-05	0.00940648	SNP, RNA
	REACTOME_HCMV_INFECTION	122	0.00459274	0.984953	1.54986e-05	0.158061	1	0.000798063	0.00459274	6.30862e-05	0.00940648	SNP, RNA
	REACTOME_NEUROTRANSMITTER_RECEPTORS_AND_POSTSYNAPTIC_SIGNAL_TRANSMISSION	189	0.00479295	0.133739	2.77474e-07	0.161248	0.84572	7.86083e-05	0.00479295	6.86968e-05	0.00973091	SNP, RNA
	REACTOME_ANTIVIRAL_MECHANISM_BY_IFN_STIMULATED_GENES	80	0.00131862	0.994149	0.00531688	0.0556181	1	0.029651	0.00531688	8.45069e-05	0.0104211	SNP, RNA
	REACTOME_COSTIMULATION_BY_THE_CD28_FAMILY	65	1.03176e-65	0.00536112	0.10989	2.6507e-63	0.445281	0.202946	0.00536112	8.59167e-05	0.0104211	SNP, DNAm
	REACTOME_FACTORS_INVOLVED_IN_MEGAKARYOCYTE_DEVELOPMENT_AND_PLATELET_PRODUCTION	157	3.32047e-06	0.0282464	0.00539124	0.00022342	0.647767	0.0297147	0.00539124	8.68829e-05	0.0104211	SNP, RNA
	REACTOME_FCGAMMA_RECEPTOR_FCGR_DEPENDENT_PHAGOCYTOSIS	83	0.107591	0.00543458	0.00297835	0.932779	0.445281	0.0212536	0.00543458	8.8283e-05	0.0104211	DNAm, RNA
	REACTOME_OPIOID_SIGNALLING	89	0.590947	0.00446877	0.00576304	0.999201	0.445281	0.0309804	0.00576304	9.92551e-05	0.0112476	DNAm, RNA
	KEGG_RIG_I_LIKE_RECEPTOR_SIGNALING_PATHWAY	66	4.40957e-06	0.491193	0.00606048	0.000270901	1	0.0320922	0.00606048	0.000109743	0.0119578	SNP, RNA
	KEGG_LEUKOCYTE_TRANSENDOTHELIAL_MIGRATION	109	0.629811	0.000538463	0.00695281	0.999201	0.138679	0.0354268	0.00695281	0.000144353	0.0146944	DNAm, RNA
	REACTOME_TRANSCRIPTIONAL_REGULATION_BY_SMALL_RNAS	74	0.0070223	0.993321	0.0058374	0.218966	1	0.0311438	0.0070223	0.000147245	0.0146944	SNP, RNA
	REACTOME_RHO_GTPASES_ACTIVATE_NADPH_OXIDASES	22	0.575615	0.000728728	0.0071759	0.999201	0.147463	0.0362376	0.0071759	0.000153741	0.0146944	DNAm, RNA
	REACTOME_SIGNALING_BY_VEGF	102	0.0846125	0.00733577	0.00022786	0.870933	0.45172	0.00400949	0.00733577	0.000160651	0.0146944	DNAm, RNA
	KEGG_ENDOCYTOSIS	177	0.00733902	0.327715	0.000271139	0.223011	1	0.00454519	0.00733902	0.000160793	0.0146944	SNP, RNA
	REACTOME_CELL_SURFACE_INTERACTIONS_AT_THE_VASCULAR_WALL	131	0.0604825	0.00744882	0.0075477	0.783533	0.45172	0.0371226	0.0075477	0.000170043	0.0150275	DNAm, RNA
	REACTOME_SIGNALING_BY_ERYTHROPOIETIN	25	0.461855	0.00765823	0.000755606	0.999201	0.45172	0.008461	0.00765823	0.000175047	0.0150275	DNAm, RNA
	PID_BCR_5PATHWAY	60	0.289706	0.00779538	0.00457327	0.999201	0.45172	0.0268798	0.00779538	0.000181357	0.0151113	DNAm, RNA
	REACTOME_INFLUENZA_INFECTION	149	0.00808607	0.999909	0.000108858	0.240775	1	0.00268169	0.00808607	0.000195096	0.0157916	SNP, RNA
	REACTOME_DISORDERS_OF_TRANSMEMBRANE_TRANSPORTERS	166	0.0084709	0.871197	0.00650665	0.249362	1	0.0340098	0.0084709	0.000214053	0.0168448	SNP, RNA
	REACTOME_HCMV_EARLY_EVENTS	98	0.00879174	0.935835	0.00022786	0.256139	1	0.00400949	0.00879174	0.000230525	0.0176507	SNP, RNA
	KEGG_FC_GAMMA_R_MEDIATED_PHAGOCYTOSIS	92	0.312125	0.00912182	8.6297e-05	0.999201	0.478558	0.00239686	0.00912182	0.000248105	0.0184969	DNAm, RNA
	PID_RAC1_PATHWAY	52	0.541641	0.0096761	1.36855e-05	0.999201	0.486309	0.000732561	0.0096761	0.000279069	0.0202718	DNAm, RNA
	PID_ERBB1_DOWNSTREAM_PATHWAY	103	0.775595	0.0101279	7.72726e-05	0.999201	0.486309	0.00226642	0.0101279	0.000305643	0.0216472	DNAm, RNA
	WP_ADIPOGENESIS	128	0.0510055	0.0066389	0.0105368	0.75536	0.45172	0.0463521	0.0105368	0.000330733	0.0228529	DNAm, RNA
	REACTOME_INOSITOL_PHOSPHATE_METABOLISM	44	0.0592829	0.0114231	0.000214257	0.782503	0.497873	0.00389095	0.0114231	0.000388483	0.0262041	DNAm, RNA
	WP_COPPER_HOMEOSTASIS	51	0.0116947	0.552094	0.00710154	0.324013	1	0.0359262	0.0116947	0.000407102	0.0268214	SNP, RNA
	KEGG_ASTHMA	26	7.06061e-76	0.0119438	0.881119	6.65109e-73	0.502031	0.907713	0.0119438	0.000424555	0.0271199	SNP, DNAm
	REACTOME_PARASITE_INFECTION	56	0.0676691	0.00599671	0.0120314	0.803499	0.44707	0.0504961	0.0120314	0.000430778	0.0271199	DNAm, RNA
	KEGG_MTOR_SIGNALING_PATHWAY	49	0.38853	0.0124218	0.00934116	0.999201	0.502031	0.0428906	0.0124218	0.000459067	0.0282725	DNAm, RNA
	KEGG_LEISHMANIA_INFECTION	67	2.82488e-62	0.0125818	0.03996	5.70221e-60	0.502031	0.106198	0.0125818	0.000470921	0.0283855	SNP, DNAm
	WP_B_CELL_RECEPTOR_SIGNALING_PATHWAY	93	0.481502	0.0129167	1.32687e-05	0.999201	0.50421	0.000732561	0.0129167	0.000496212	0.0292868	DNAm, RNA
	REACTOME_RNA_POLYMERASE_I_TRANSCRIPTION	76	0.0137232	0.647671	0.0022014	0.365865	1	0.0170398	0.0137232	0.000559809	0.0323661	SNP, RNA
	WP_GENES_INVOLVED_IN_MALE_INFERTILITY	134	2.34852e-06	0.810709	0.0145721	0.000161876	1	0.0578191	0.0145721	0.000630851	0.0350648	SNP, RNA
	REACTOME_TRNA_PROCESSING	103	0.0145766	0.999885	0.000773924	0.379379	1	0.00853123	0.0145766	0.00063124	0.0350648	SNP, RNA
	WP_CAMKK2_PATHWAY	33	0.83663	0.00641149	0.0147216	0.999201	0.45172	0.0582489	0.0147216	0.000643793	0.0350744	DNAm, RNA
	PID_P53_DOWNSTREAM_PATHWAY	135	0.12016	0.0150511	0.00197942	0.934578	0.538378	0.0158409	0.0150511	0.000672792	0.0359626	DNAm, RNA
	WP_CYTOKINES_AND_INFLAMMATORY_RESPONSE	25	1.60219e-30	0.0153451	0.962038	1.37206e-28	0.538378	0.970258	0.0153451	0.000699188	0.0366815	SNP, DNAm
	REACTOME_ERYTHROPOIETIN_ACTIVATES_PHOSPHOINOSITIDE_3_KINASE_PI3K	12	0.136964	0.0155358	0.0150205	0.956801	0.538378	0.0589377	0.0155358	0.000716587	0.0369107	DNAm, RNA
	BIOCARTA_D4GDI_PATHWAY	12	0.00907597	1	0.0157707	0.259078	1	0.0611196	0.0157707	0.000738302	0.0373502	SNP, RNA
	WP_ANGIOPOIETIN_LIKE_PROTEIN_8_REGULATORY_PATHWAY	127	0.251361	0.0160822	1.66848e-06	0.999201	0.542392	0.00019695	0.0160822	0.000767594	0.0376942	DNAm, RNA
	REACTOME_DAP12_INTERACTIONS	38	0.0161256	0.00540153	0.046953	0.402618	0.445281	0.117715	0.0161256	0.000771714	0.0376942	SNP, DNAm
	SIG_BCR_SIGNALING_PATHWAY	45	0.475938	0.0171898	0.00427583	0.999201	0.562548	0.0261065	0.0171898	0.00087631	0.0420777	DNAm, RNA
	BIOCARTA_GH_PATHWAY	27	0.416532	0.0175772	0.00859389	0.999201	0.562548	0.0403087	0.0175772	0.000916015	0.0432512	DNAm, RNA
	WP_TARGET_OF_RAPAMYCIN_TOR_SIGNALING	35	0.715544	0.0182716	0.013227	0.999201	0.562548	0.0542288	0.0182716	0.000989349	0.0451103	DNAm, RNA
	KEGG_CELL_ADHESION_MOLECULES_CAMS	123	0.0183169	0.0033176	0.370629	0.442422	0.427217	0.467911	0.0183169	0.00099423	0.0451103	SNP, DNAm
	KEGG_B_CELL_RECEPTOR_SIGNALING_PATHWAY	73	0.316698	0.0185784	7.84006e-05	0.999201	0.562548	0.00226642	0.0185784	0.00102265	0.0451103	DNAm, RNA
	WP_TCELL_ANTIGEN_RECEPTOR_TCR_SIGNALING_PATHWAY	86	0.494138	0.0187697	0.00268237	0.999201	0.562548	0.0198412	0.0187697	0.00104368	0.0451103	DNAm, RNA
	BIOCARTA_AGPCR_PATHWAY	11	0.599862	0.0118939	0.0187746	0.999201	0.502031	0.0682778	0.0187746	0.00104422	0.0451103	DNAm, RNA
	REACTOME_RNA_POLYMERASE_I_PROMOTER_ESCAPE	57	0.0190399	0.974805	0.000691495	0.452157	1	0.00802871	0.0190399	0.00107375	0.0451103	SNP, RNA
	BIOCARTA_MELANOCYTE_PATHWAY	7	0.80237	0.00781302	0.019075	0.999201	0.45172	0.06884	0.019075	0.00107768	0.0451103	DNAm, RNA
	WP_CANCER_IMMUNOTHERAPY_BY_CTLA4_BLOCKADE	14	8.97195e-26	0.0192176	0.0208773	7.45728e-24	0.562548	0.0728391	0.0192176	0.00109375	0.0451103	SNP, DNAm
	PID_HDAC_CLASSI_PATHWAY	61	0.502233	0.0192613	0.00702717	0.999201	0.562548	0.0357414	0.0192613	0.0010987	0.0451103	DNAm, RNA
	REACTOME_INTEGRATION_OF_ENERGY_METABOLISM	104	0.831422	0.0129923	0.0199761	0.999201	0.50421	0.0707405	0.0199761	0.00118119	0.0478046	DNAm, RNA
	REACTOME_HOST_INTERACTIONS_OF_HIV_FACTORS	125	0.0204494	0.919984	0.000966438	0.477602	1	0.00999241	0.0204494	0.00123743	0.0491491	SNP, RNA
	REACTOME_EPIGENETIC_REGULATION_OF_GENE_EXPRESSION	111	0.0206524	0.607231	0.00305235	0.478391	1	0.0215107	0.0206524	0.00126195	0.0491491	SNP, RNA
	REACTOME_INTERLEUKIN_3_INTERLEUKIN_5_AND_GM_CSF_SIGNALING	44	0.266247	0.0206896	0.0202765	0.999201	0.598097	0.0716251	0.0206896	0.00126646	0.0491491	DNAm, RNA
	KEGG_CHRONIC_MYELOID_LEUKEMIA	71	0.32943	0.020958	7.62028e-07	0.999201	0.599738	0.000134927	0.020958	0.0012993	0.0497422	DNAm, RNA

## Sheet: S7
	Supplementary Table 7 Results of mitch analysis of multi-omics datasets in Alzheimer's disease. A total of 237 pathways were significant at 5% false discovery rate.
	Pathway	Size	P-value	FDR
	KEGG_SYSTEMIC_LUPUS_ERYTHEMATOSUS	128	7.49276e-19	2.11146e-15
	REACTOME_SIRT1_NEGATIVELY_REGULATES_RRNA_EXPRESSION	65	3.16269e-15	4.45623e-12
	REACTOME_DNA_METHYLATION	62	1.21476e-13	1.14107e-10
	REACTOME_ACTIVATED_PKN1_STIMULATES_TRANSCRIPTION_OF_AR_ANDROGEN_RECEPTOR_REGULATED_GENES_KLK2_AND_KLK3	64	2.39642e-13	1.68828e-10
	REACTOME_HDACS_DEACETYLATE_HISTONES	91	6.02909e-13	3.39799e-10
	REACTOME_CONDENSATION_OF_PROPHASE_CHROMOSOMES	71	5.28047e-12	2.48006e-09
	REACTOME_HDMS_DEMETHYLATE_HISTONES	45	5.1719e-11	2.08206e-08
	REACTOME_FORMATION_OF_THE_CORNIFIED_ENVELOPE	129	4.20596e-10	1.48155e-07
	REACTOME_PRC2_METHYLATES_HISTONES_AND_DNA	70	5.39531e-10	1.68933e-07
	REACTOME_TRANSCRIPTIONAL_REGULATION_OF_GRANULOPOIESIS	88	6.79105e-10	1.91372e-07
	REACTOME_FORMATION_OF_THE_BETA_CATENIN_TCF_TRANSACTIVATING_COMPLEX	90	9.3431e-10	2.39353e-07
	REACTOME_AMYLOID_FIBER_FORMATION	107	1.33921e-09	3.14492e-07
	REACTOME_IMMUNOREGULATORY_INTERACTIONS_BETWEEN_A_LYMPHOID_AND_A_NON_LYMPHOID_CELL	125	1.59611e-09	3.45987e-07
	PID_KIT_PATHWAY	52	2.05579e-09	4.13801e-07
	REACTOME_HCMV_LATE_EVENTS	116	7.65492e-09	1.39213e-06
	REACTOME_ERCC6_CSB_AND_EHMT2_G9A_POSITIVELY_REGULATE_RRNA_EXPRESSION	73	7.90423e-09	1.39213e-06
	WP_TYROBP_CAUSAL_NETWORK	60	1.15706e-08	1.83123e-06
	REACTOME_RNA_POLYMERASE_I_PROMOTER_ESCAPE	88	1.1697e-08	1.83123e-06
	REACTOME_B_WICH_COMPLEX_POSITIVELY_REGULATES_RRNA_EXPRESSION	89	1.71597e-08	2.46001e-06
	KEGG_RETINOL_METABOLISM	62	1.74593e-08	2.46001e-06
	REACTOME_PRE_NOTCH_EXPRESSION_AND_PROCESSING	117	3.59361e-08	4.47769e-06
	KEGG_ASCORBATE_AND_ALDARATE_METABOLISM	25	3.78379e-08	4.47769e-06
	REACTOME_RMTS_METHYLATE_HISTONE_ARGININES	77	3.82475e-08	4.47769e-06
	REACTOME_GLUCURONIDATION	25	3.91724e-08	4.47769e-06
	KEGG_HEMATOPOIETIC_CELL_LINEAGE	82	3.9724e-08	4.47769e-06
	WP_GLUCURONIDATION	26	6.71312e-08	7.27599e-06
	WP_KIT_RECEPTOR_SIGNALING_PATHWAY	58	8.78068e-08	9.16443e-06
	REACTOME_RUNX1_REGULATES_GENES_INVOLVED_IN_MEGAKARYOCYTE_DIFFERENTIATION_AND_PLATELET_FUNCTION	95	9.47073e-08	9.53161e-06
	KEGG_PENTOSE_AND_GLUCURONATE_INTERCONVERSIONS	28	1.73657e-07	1.68746e-05
	REACTOME_HCMV_EARLY_EVENTS	134	2.33406e-07	2.19246e-05
	REACTOME_INTERLEUKIN_10_SIGNALING	45	2.97902e-07	2.70803e-05
	REACTOME_ACTIVATION_OF_ANTERIOR_HOX_GENES_IN_HINDBRAIN_DEVELOPMENT_DURING_EARLY_EMBRYOGENESIS	118	3.75973e-07	3.22589e-05
	REACTOME_MEIOTIC_RECOMBINATION	85	3.84901e-07	3.22589e-05
	REACTOME_SENESCENCE_ASSOCIATED_SECRETORY_PHENOTYPE_SASP	109	3.89213e-07	3.22589e-05
	WP_16P112_PROXIMAL_DELETION_SYNDROME	74	4.75875e-07	3.83147e-05
	REACTOME_NEGATIVE_EPIGENETIC_REGULATION_OF_RRNA_EXPRESSION	105	7.43469e-07	5.81971e-05
	WP_INSULIN_SIGNALING	156	8.38965e-07	6.38974e-05
	WP_LEPTIN_SIGNALING_PATHWAY	74	1.35602e-06	0.00010056
	REACTOME_RHO_GTPASES_ACTIVATE_PKNS	91	1.48216e-06	0.000107096
	WP_MICROGLIA_PATHOGEN_PHAGOCYTOSIS_PATHWAY	39	2.9921e-06	0.000210793
	REACTOME_DISEASES_OF_PROGRAMMED_CELL_DEATH	98	3.13447e-06	0.000215437
	KEGG_TGF_BETA_SIGNALING_PATHWAY	85	4.19364e-06	0.000277994
	REACTOME_HATS_ACETYLATE_HISTONES	136	4.28279e-06	0.000277994
	REACTOME_POSITIVE_EPIGENETIC_REGULATION_OF_RRNA_EXPRESSION	103	4.42939e-06	0.000277994
	WP_CYTOKINES_AND_INFLAMMATORY_RESPONSE	26	4.43922e-06	0.000277994
	KEGG_UBIQUITIN_MEDIATED_PROTEOLYSIS	127	6.26468e-06	0.00038378
	BIOCARTA_IL5_PATHWAY	11	7.32687e-06	0.0004393
	REACTOME_RNA_POLYMERASE_I_TRANSCRIPTION	107	9.21762e-06	0.000541151
	WP_CELL_CYCLE	119	1.16166e-05	0.000668072
	WP_ANGIOPOIETIN_LIKE_PROTEIN_8_REGULATORY_PATHWAY	127	1.25844e-05	0.000709256
	REACTOME_HCMV_INFECTION	158	1.57699e-05	0.000857906
	KEGG_CELL_CYCLE	121	1.61232e-05	0.000857906
	WP_HISTONE_MODIFICATIONS	68	1.61352e-05	0.000857906
	KEGG_TYPE_I_DIABETES_MELLITUS	41	1.75593e-05	0.000913894
	PID_EPO_PATHWAY	32	1.7891e-05	0.000913894
	REACTOME_SIGNALING_BY_TGFB_FAMILY_MEMBERS	99	1.81611e-05	0.000913894
	REACTOME_PTEN_REGULATION	136	2.40977e-05	0.00119136
	WP_B_CELL_RECEPTOR_SIGNALING_PATHWAY	95	2.76798e-05	0.00133544
	KEGG_PORPHYRIN_AND_CHLOROPHYLL_METABOLISM	39	2.79599e-05	0.00133544
	KEGG_DRUG_METABOLISM_CYTOCHROME_P450	70	2.85185e-05	0.00133942
	REACTOME_TRANSCRIPTIONAL_REGULATION_BY_SMALL_RNAS	105	3.12477e-05	0.00144354
	WP_IL3_SIGNALING_PATHWAY	48	3.45599e-05	0.0015708
	PID_TCR_PATHWAY	60	4.07095e-05	0.00182094
	REACTOME_S_PHASE	158	4.19474e-05	0.001847
	KEGG_ASTHMA	27	4.39632e-05	0.00190597
	REACTOME_REPRODUCTION	141	5.16146e-05	0.00220379
	KEGG_GRAFT_VERSUS_HOST_DISEASE	37	5.28207e-05	0.00222162
	WP_COVID19_ADVERSE_OUTCOME_PATHWAY	14	5.78733e-05	0.00239834
	KEGG_CHRONIC_MYELOID_LEUKEMIA	71	6.01971e-05	0.00245848
	KEGG_METABOLISM_OF_XENOBIOTICS_BY_CYTOCHROME_P450	70	6.1464e-05	0.00247436
	REACTOME_PEPTIDE_LIGAND_BINDING_RECEPTORS	190	7.70794e-05	0.00305929
	REACTOME_MEIOSIS	115	8.13305e-05	0.00318319
	WP_CODEINE_AND_MORPHINE_METABOLISM	15	8.62497e-05	0.00332947
	REACTOME_DEPOSITION_OF_NEW_CENPA_CONTAINING_NUCLEOSOMES_AT_THE_CENTROMERE	69	9.47857e-05	0.00360954
	KEGG_CHEMOKINE_SIGNALING_PATHWAY	184	9.68804e-05	0.00364012
	KEGG_INSULIN_SIGNALING_PATHWAY	131	0.00010542	0.00386111
	REACTOME_RECOGNITION_AND_ASSOCIATION_OF_DNA_GLYCOSYLASE_WITH_SITE_CONTAINING_AN_AFFECTED_PURINE	54	0.000105502	0.00386111
	REACTOME_REGULATION_OF_PTEN_GENE_TRANSCRIPTION	59	0.000112868	0.00407771
	WP_PATHOGENESIS_OF_SARSCOV2_MEDIATED_BY_NSP9NSP10_COMPLEX	20	0.000124684	0.00444759
	REACTOME_BASE_EXCISION_REPAIR_AP_SITE_FORMATION	61	0.000127307	0.00448437
	PID_INTEGRIN2_PATHWAY	28	0.000132388	0.00460579
	REACTOME_CYP2E1_REACTIONS	11	0.000142649	0.00490224
	BIOCARTA_INFLAM_PATHWAY	27	0.000155858	0.00529166
	REACTOME_REGULATION_OF_TP53_ACTIVITY	156	0.000160015	0.00536812
	REACTOME_MRNA_SPLICING	181	0.000163109	0.00537032
	REACTOME_INTERLEUKIN_3_INTERLEUKIN_5_AND_GM_CSF_SIGNALING	45	0.000163892	0.00537032
	REACTOME_ER_TO_GOLGI_ANTEROGRADE_TRANSPORT	152	0.000166977	0.00540852
	REACTOME_RUNX1_REGULATES_TRANSCRIPTION_OF_GENES_INVOLVED_IN_DIFFERENTIATION_OF_HSCS	126	0.000170087	0.00544666
	PID_BCR_5PATHWAY	60	0.000190422	0.00602931
	WP_EGFR_TYROSINE_KINASE_INHIBITOR_RESISTANCE	83	0.000199309	0.00624057
	WP_IL5_SIGNALING_PATHWAY	38	0.000205564	0.0063657
	KEGG_RIBOSOME	82	0.000210212	0.00643889
	KEGG_NEUROTROPHIN_SIGNALING_PATHWAY	120	0.000219224	0.00664271
	REACTOME_SIGNALING_BY_NTRKS	132	0.000232041	0.00695629
	REACTOME_INOSITOL_PHOSPHATE_METABOLISM	45	0.000249542	0.0074022
	REACTOME_ANTIMICROBIAL_PEPTIDES	95	0.000268318	0.00787626
	REACTOME_CIRCADIAN_CLOCK	69	0.000271626	0.00789116
	REACTOME_TRANSCRIPTION_OF_E2F_TARGETS_UNDER_NEGATIVE_CONTROL_BY_DREAM_COMPLEX	19	0.000293995	0.00837877
	WP_ALLOGRAFT_REJECTION	87	0.000294357	0.00837877
	BIOCARTA_THELPER_PATHWAY	12	0.000303822	0.00855131
	BIOCARTA_MAPK_PATHWAY	78	0.000306794	0.00855131
	REACTOME_SIGNALING_BY_TGF_BETA_RECEPTOR_COMPLEX	71	0.000309522	0.00855131
	WP_CHEMOKINE_SIGNALING_PATHWAY	161	0.000322978	0.00883643
	PID_PDGFRB_PATHWAY	127	0.000331089	0.00897124
	KEGG_ALLOGRAFT_REJECTION	34	0.000339291	0.00910593
	REACTOME_ARACHIDONIC_ACID_METABOLISM	56	0.000343386	0.00912889
	WP_ANDROGEN_RECEPTOR_SIGNALING_PATHWAY	88	0.000352279	0.00927778
	WP_PROLACTIN_SIGNALING_PATHWAY	74	0.000369404	0.00957616
	PID_IL2_1PATHWAY	54	0.000372497	0.00957616
	REACTOME_CHEMOKINE_RECEPTORS_BIND_CHEMOKINES	57	0.000373803	0.00957616
	BIOCARTA_CTCF_PATHWAY	24	0.000377488	0.00958344
	REACTOME_MITOTIC_PROPHASE	139	0.000389342	0.00979612
	REACTOME_SIGNALING_BY_SCF_KIT	43	0.000403605	0.0100651
	KEGG_INTESTINAL_IMMUNE_NETWORK_FOR_IGA_PRODUCTION	44	0.000434425	0.0107387
	REACTOME_NONSENSE_MEDIATED_DECAY_NMD	108	0.000516192	0.012649
	WP_DOPAMINERGIC_NEUROGENESIS	30	0.000543623	0.0131041
	WP_MIRNAS_INVOLVEMENT_IN_THE_IMMUNE_RESPONSE_IN_SEPSIS	57	0.000544067	0.0131041
	BIOCARTA_PYK2_PATHWAY	27	0.000558385	0.013335
	REACTOME_DEFENSINS	52	0.000567623	0.0134092
	BIOCARTA_MTA3_PATHWAY	18	0.000571011	0.0134092
	WP_ADIPOGENESIS	129	0.000596849	0.0139002
	WP_INTEGRATED_BREAST_CANCER_PATHWAY	151	0.000604637	0.0139661
	KEGG_INOSITOL_PHOSPHATE_METABOLISM	53	0.000615806	0.0139844
	BIOCARTA_MET_PATHWAY	32	0.00062075	0.0139844
	REACTOME_TRANSCRIPTIONAL_ACTIVITY_OF_SMAD2_SMAD3_SMAD4_HETEROTRIMER	42	0.000624087	0.0139844
	REACTOME_GENERATION_OF_SECOND_MESSENGER_MOLECULES	30	0.000625276	0.0139844
	KEGG_AUTOIMMUNE_THYROID_DISEASE	49	0.000630253	0.0139847
	REACTOME_CELLULAR_RESPONSE_TO_STARVATION	149	0.000653754	0.0143928
	REACTOME_SMAD2_SMAD3_SMAD4_HETEROTRIMER_REGULATES_TRANSCRIPTION	31	0.000694502	0.0150694
	WP_EXTRACELLULAR_VESICLES_IN_THE_CROSSTALK_OF_CARDIAC_CELLS	28	0.000695182	0.0150694
	REACTOME_DNA_DAMAGE_TELOMERE_STRESS_INDUCED_SENESCENCE	78	0.000707332	0.0152157
	BIOCARTA_FCER1_PATHWAY	37	0.000754208	0.015994
	KEGG_T_CELL_RECEPTOR_SIGNALING_PATHWAY	104	0.000754863	0.015994
	PID_NFAT_3PATHWAY	53	0.000762655	0.0160385
	WP_CYTOPLASMIC_RIBOSOMAL_PROTEINS	82	0.000817787	0.0170705
	REACTOME_SIGNALING_BY_ERYTHROPOIETIN	25	0.000843406	0.0174759
	WP_LIPID_METABOLISM_PATHWAY	28	0.000850822	0.0175008
	REACTOME_INTRA_GOLGI_AND_RETROGRADE_GOLGI_TO_ER_TRAFFIC	197	0.000971227	0.0198327
	WP_BRAINDERIVED_NEUROTROPHIC_FACTOR_BDNF_SIGNALING_PATHWAY	138	0.000983436	0.0198623
	REACTOME_TRANSPORT_TO_THE_GOLGI_AND_SUBSEQUENT_MODIFICATION	183	0.000989787	0.0198623
	REACTOME_FLT3_SIGNALING	38	0.000994446	0.0198623
	WP_ENERGY_METABOLISM	48	0.00101253	0.0198623
	REACTOME_EPIGENETIC_REGULATION_OF_GENE_EXPRESSION	142	0.00101434	0.0198623
	PID_CD8_TCR_PATHWAY	51	0.00101497	0.0198623
	REACTOME_OXIDATIVE_STRESS_INDUCED_SENESCENCE	123	0.0010378	0.0201692
	KEGG_STARCH_AND_SUCROSE_METABOLISM	52	0.00105694	0.0204004
	WP_COMMON_PATHWAYS_UNDERLYING_DRUG_ADDICTION	39	0.0010946	0.0206934
	REACTOME_INFLUENZA_INFECTION	150	0.00109534	0.0206934
	REACTOME_RRNA_PROCESSING	192	0.00109646	0.0206934
	REACTOME_EUKARYOTIC_TRANSLATION_ELONGATION	88	0.0011015	0.0206934
	BIOCARTA_AT1R_PATHWAY	26	0.00116111	0.0216689
	KEGG_ADIPOCYTOKINE_SIGNALING_PATHWAY	64	0.00120416	0.0223246
	REACTOME_CELL_SURFACE_INTERACTIONS_AT_THE_VASCULAR_WALL	132	0.00122397	0.0225156
	REACTOME_INTERFERON_GAMMA_SIGNALING	89	0.00123045	0.0225156
	KEGG_ALDOSTERONE_REGULATED_SODIUM_REABSORPTION	40	0.00126617	0.0228496
	KEGG_SPLICEOSOME	123	0.00127843	0.0228496
	PID_MYC_REPRESS_PATHWAY	62	0.00127853	0.0228496
	WP_HEMATOPOIETIC_STEM_CELL_DIFFERENTIATION	59	0.00128114	0.0228496
	REACTOME_SRP_DEPENDENT_COTRANSLATIONAL_PROTEIN_TARGETING_TO_MEMBRANE	106	0.00133386	0.0236404
	KEGG_PANCREATIC_CANCER	66	0.00135335	0.0238359
	WP_TGFBETA_SIGNALING_PATHWAY	130	0.00137342	0.0240392
	BIOCARTA_TCYTOTOXIC_PATHWAY	12	0.00141318	0.0245824
	KEGG_NON_SMALL_CELL_LUNG_CANCER	53	0.00143109	0.0246839
	BIOCARTA_CSK_PATHWAY	20	0.00144468	0.0246839
	WP_TCELL_ANTIGEN_RECEPTOR_TCR_SIGNALING_PATHWAY	88	0.0014453	0.0246839
	PID_AMB2_NEUTROPHILS_PATHWAY	41	0.00145973	0.0247803
	REACTOME_HEME_SIGNALING	47	0.00147036	0.0248112
	REACTOME_G0_AND_EARLY_G1	27	0.00150928	0.0253164
	BIOCARTA_BLYMPHOCYTE_PATHWAY	12	0.00157917	0.026332
	PID_ERBB1_RECEPTOR_PROXIMAL_PATHWAY	35	0.00160664	0.0266325
	PID_SMAD2_3NUCLEAR_PATHWAY	76	0.0016351	0.0267435
	REACTOME_GENE_SILENCING_BY_RNA	138	0.00163666	0.0267435
	REACTOME_TIE2_SIGNALING	18	0.00164181	0.0267435
	PID_PI3KCI_PATHWAY	47	0.00180733	0.0292704
	SIG_IL4RECEPTOR_IN_B_LYPHOCYTES	27	0.0018519	0.0297231
	REACTOME_INTERLEUKIN_4_AND_INTERLEUKIN_13_SIGNALING	103	0.00185638	0.0297231
	REACTOME_PKMTS_METHYLATE_HISTONE_LYSINES	69	0.00189951	0.0301628
	REACTOME_INHIBITION_OF_DNA_RECOMBINATION_AT_TELOMERE	65	0.00190524	0.0301628
	WP_MET_IN_TYPE_1_PAPILLARY_RENAL_CELL_CARCINOMA	55	0.00192742	0.0303434
	REACTOME_REGULATION_OF_SIGNALING_BY_CBL	22	0.00197281	0.0308854
	PID_RAC1_PATHWAY	52	0.00200804	0.0310963
	REACTOME_DOWNSTREAM_SIGNAL_TRANSDUCTION	29	0.00200835	0.0310963
	BIOCARTA_GRANULOCYTES_PATHWAY	14	0.00202238	0.0311425
	WP_VITAMIN_D_RECEPTOR_PATHWAY	179	0.00206641	0.0315225
	BIOCARTA_TCRA_PATHWAY	12	0.00206944	0.0315225
	WP_GENES_RELATED_TO_PRIMARY_CILIUM_DEVELOPMENT_BASED_ON_CRISPR	102	0.00208566	0.0315989
	REACTOME_HIV_LIFE_CYCLE	145	0.00214625	0.0323429
	REACTOME_RESPONSE_OF_EIF2AK4_GCN2_TO_AMINO_ACID_DEFICIENCY	95	0.00219495	0.0329008
	PID_ALK1_PATHWAY	26	0.00223449	0.0332892
	PID_INSULIN_PATHWAY	44	0.0022542	0.0332892
	KEGG_JAK_STAT_SIGNALING_PATHWAY	147	0.0022563	0.0332892
	REACTOME_INTERLEUKIN_7_SIGNALING	34	0.0022779	0.033433
	REACTOME_REGULATION_OF_EXPRESSION_OF_SLITS_AND_ROBOS	162	0.00236741	0.0345667
	REACTOME_ESTROGEN_DEPENDENT_GENE_EXPRESSION	145	0.00240181	0.0348881
	KEGG_B_CELL_RECEPTOR_SIGNALING_PATHWAY	73	0.00250289	0.0361699
	WP_RAS_SIGNALING	180	0.00253589	0.0364598
	WP_TGFBETA_RECEPTOR_SIGNALLING_IN_SKELETAL_DYSPLASIAS	60	0.00255269	0.0365152
	WP_G13_SIGNALING_PATHWAY	38	0.00260733	0.0371083
	WP_MYOMETRIAL_RELAXATION_AND_CONTRACTION_PATHWAYS	156	0.00262327	0.0371476
	REACTOME_TRANSCRIPTION_OF_THE_HIV_GENOME	66	0.00266842	0.0374257
	PID_IL4_2PATHWAY	57	0.00266947	0.0374257
	PID_SMAD2_3PATHWAY	16	0.00269891	0.0376511
	REACTOME_PI_METABOLISM	78	0.0027858	0.0385196
	REACTOME_METALLOPROTEASE_DUBS	36	0.0027885	0.0385196
	REACTOME_TRISTETRAPROLIN_TTP_ZFP36_BINDS_AND_DESTABILIZES_MRNA	17	0.00283098	0.0389156
	KEGG_LYSINE_DEGRADATION	42	0.00289459	0.0395968
	REACTOME_BETA_DEFENSINS	42	0.00300467	0.0409041
	WP_MBDNF_AND_PROBDNF_REGULATION_OF_GABA_NEUROTRANSMISSION	35	0.00301944	0.0409076
	WP_LUNG_FIBROSIS	61	0.00314007	0.0423383
	REACTOME_REGULATION_OF_IFNG_SIGNALING	14	0.00317048	0.0424947
	REACTOME_SIGNALING_BY_FGFR1	49	0.00318182	0.0424947
	REACTOME_POTASSIUM_CHANNELS	102	0.00324933	0.0431915
	WP_OLIGODENDROCYTE_SPECIFICATION_AND_DIFFERENTIATION_LEADING_TO_MYELIN_COMPONENTS_FOR_CNS	29	0.00329998	0.0436589
	REACTOME_SUMO_IS_CONJUGATED_TO_E1_UBA2_SAE1	5	0.00332893	0.0438361
	KEGG_LONG_TERM_POTENTIATION	66	0.00335161	0.0439294
	REACTOME_INTERLEUKIN_RECEPTOR_SHC_SIGNALING	24	0.0033689	0.0439517
	KEGG_COLORECTAL_CANCER	61	0.00338507	0.0439591
	KEGG_GLIOMA	64	0.00343159	0.0442747
	WP_MECP2_AND_ASSOCIATED_RETT_SYNDROME	68	0.00344079	0.0442747
	REACTOME_PD_1_SIGNALING	21	0.00347043	0.0444326
	WP_TGFBETA_RECEPTOR_SIGNALING	56	0.0034846	0.0444326
	KEGG_LEISHMANIA_INFECTION	68	0.0035335	0.0448532
	PID_IL27_PATHWAY	26	0.00362272	0.0457795
	REACTOME_FC_EPSILON_RECEPTOR_FCERI_SIGNALING	127	0.00366596	0.046119
	WP_OSTEOBLAST_DIFFERENTIATION	119	0.00374773	0.0467958
	REACTOME_FATTY_ACID_METABOLISM	169	0.00375297	0.0467958
	BIOCARTA_NPP1_PATHWAY	8	0.00377316	0.0468404
	WP_INSULIN_SIGNALLING_IN_HUMAN_ADIPOCYTES_NORMAL_CONDITION	8	0.00382307	0.0470454
	WP_INSULIN_SIGNALLING_IN_HUMAN_ADIPOCYTES_DIABETIC_CONDITION	8	0.00382307	0.0470454
	REACTOME_VOLTAGE_GATED_POTASSIUM_CHANNELS	42	0.00385324	0.0472106
	REACTOME_PHASE_II_CONJUGATION_OF_COMPOUNDS	109	0.00396001	0.0482329
	WP_MESODERMAL_COMMITMENT_PATHWAY	149	0.00397091	0.0482329
	PID_TCR_JNK_PATHWAY	14	0.00400244	0.0484071
	REACTOME_ASYMMETRIC_LOCALIZATION_OF_PCP_PROTEINS	63	0.00411839	0.0495967
	REACTOME_RND3_GTPASE_CYCLE	41	0.00418294	0.0498818
	REACTOME_PURINERGIC_SIGNALING_IN_LEISHMANIASIS_INFECTION	26	0.0041923	0.0498818
	SA_B_CELL_RECEPTOR_COMPLEXES	22	0.00419517	0.0498818
